# Supplementary material
Source: publisher figshare collection journal article supplement (https://frontiersin.figshare.com/ndownloader/files/24560132)
Supplement: Supplementary file 1 [file 24560132]

## Sheet: Wordcloud (A)
Supplementary Material A: accountability of study words by spatial context
outside Brazil							inside Brazil							local MPA case study
Word	Word length	Frequency	%	Rank	Documents	Documents %	Word	Word length	Frequency	%	Rank	Documents	Documents %	Word	Word length	Frequency	%	Rank	Documents	Documents %
conservation	12	263	1.18693	1	1	100	conservation	12	47	1.56146	1	1	100	tourism	7	13	6.25	1	1	100
species	7	165	0.744652	2	1	100	environmental	13	40	1.3289	2	1	100	caeté_taperaçu	14	9	4.32692	2	1	100
fisheries	9	154	0.695009	3	1	100	fishing	7	38	1.26246	3	1	100	extractive_reserve	18	9	4.32692	2	1	100
fishing	7	137	0.618287	4	1	100	local	5	35	1.16279	4	1	100	communities	11	5	2.40385	4	1	100
ecosystem	9	104	0.469356	5	1	100	use	3	29	0.963455	5	1	100	socio_cultural	14	4	1.92308	5	1	100
sea	3	101	0.455817	6	1	100	social	6	24	0.797342	6	1	100	sustainability	14	4	1.92308	5	1	100
use	3	94	0.424226	7	1	100	resources	9	19	0.631229	7	1	100	sustainable	11	3	1.44231	7	1	100
biodiversity	12	89	0.401661	8	1	100	biodiversity	12	18	0.598007	8	1	100	activities	10	2	0.961538	8	1	100
network	7	84	0.379096	9	1	100	area	4	17	0.564784	9	1	100	ajuruteua_beach	15	2	0.961538	8	1	100
approach	8	82	0.37007	10	1	100	natural	7	17	0.564784	9	1	100	area	4	2	0.961538	8	1	100
protection	10	81	0.365556	11	1	100	brazil	6	16	0.531561	11	1	100	beach	5	2	0.961538	8	1	100
area	4	80	0.361043	12	1	100	pas	3	16	0.531561	11	1	100	besides	7	2	0.961538	8	1	100
design	6	76	0.342991	13	1	100	artisanal	9	15	0.498339	13	1	100	community	9	2	0.961538	8	1	100
process	7	76	0.342991	13	1	100	participation	13	15	0.498339	13	1	100	conservation_units	18	2	0.961538	8	1	100
important	9	74	0.333965	15	1	100	analysis	8	13	0.431894	15	1	100	environments	12	2	0.961538	8	1	100
objectives	10	74	0.333965	15	1	100	communities	11	13	0.431894	15	1	100	located	7	2	0.961538	8	1	100
economic	8	71	0.320426	17	1	100	conflicts	9	13	0.431894	15	1	100	mangrove	8	2	0.961538	8	1	100
results	7	65	0.293348	18	1	100	knowledge	9	13	0.431894	15	1	100	natural	7	2	0.961538	8	1	100
ocean	5	64	0.288835	19	1	100	landscape	9	13	0.431894	15	1	100	plan	4	2	0.961538	8	1	100
ecological	10	63	0.284322	20	1	100	system	6	13	0.431894	15	1	100	practice	8	2	0.961538	8	1	100
msp	3	63	0.284322	20	1	100	brazilian	9	12	0.398671	21	1	100	present	7	2	0.961538	8	1	100
most	4	61	0.275296	22	1	100	fishermen	9	12	0.398671	21	1	100	relation	8	2	0.961538	8	1	100
ecosystems	10	59	0.26627	23	1	100	important	9	12	0.398671	21	1	100	sociocultural	13	2	0.961538	8	1	100
networks	8	59	0.26627	23	1	100	information	11	12	0.398671	21	1	100	ajuruteua	9	1	0.480769	24	1	100
distribution	12	58	0.261756	25	1	100	nature	6	11	0.365449	25	1	100	analysis	8	1	0.480769	24	1	100
environmental	13	58	0.261756	25	1	100	results	7	11	0.365449	25	1	100	associated	10	1	0.480769	24	1	100
habitat	7	58	0.261756	25	1	100	ecotourism	10	10	0.332226	27	1	100	attending	9	1	0.480769	24	1	100
change	6	57	0.257243	28	1	100	fishery	7	10	0.332226	27	1	100	basically	9	1	0.480769	24	1	100
potential	9	57	0.257243	28	1	100	forms	5	10	0.332226	27	1	100	being	5	1	0.480769	24	1	100
benefits	8	56	0.25273	30	1	100	human	5	10	0.332226	27	1	100	bibliographic	13	1	0.480769	24	1	100
climate	7	55	0.248217	31	1	100	populations	11	10	0.332226	27	1	100	bring	5	1	0.480769	24	1	100
zoning	6	55	0.248217	31	1	100	protection	10	10	0.332226	27	1	100	build	5	1	0.480769	24	1	100
stakeholders	12	54	0.243704	33	1	100	zoning	6	10	0.332226	27	1	100	caused	6	1	0.480769	24	1	100
using	5	54	0.243704	33	1	100	development	11	9	0.299003	34	1	100	character	9	1	0.480769	24	1	100
however	7	53	0.239191	35	1	100	participatory	13	9	0.299003	34	1	100	conflicts	9	1	0.480769	24	1	100
fishery	7	52	0.234678	36	1	100	activity	8	8	0.265781	36	1	100	considering	11	1	0.480769	24	1	100
both	4	51	0.230165	37	1	100	compensation	12	8	0.265781	36	1	100	construction	12	1	0.480769	24	1	100
should	6	51	0.230165	37	1	100	economic	8	8	0.265781	36	1	100	contact	7	1	0.480769	24	1	100
targets	7	51	0.230165	37	1	100	fisheries	9	8	0.265781	36	1	100	context	7	1	0.480769	24	1	100
model	5	50	0.225652	40	1	100	fishers	7	8	0.265781	36	1	100	contextualize	13	1	0.480769	24	1	100
reserves	8	50	0.225652	40	1	100	interviews	10	8	0.265781	36	1	100	controversial	13	1	0.480769	24	1	100
size	4	50	0.225652	40	1	100	life	4	8	0.265781	36	1	100	deforestation	13	1	0.480769	24	1	100
future	6	49	0.221139	43	1	100	mapping	7	8	0.265781	36	1	100	depends	7	1	0.480769	24	1	100
range	5	49	0.221139	43	1	100	national	8	8	0.265781	36	1	100	descriptive	11	1	0.480769	24	1	100
scale	5	49	0.221139	43	1	100	objectives	10	8	0.265781	36	1	100	despite	7	1	0.480769	24	1	100
tools	5	48	0.216626	46	1	100	perceptions	11	8	0.265781	36	1	100	development	11	1	0.480769	24	1	100
development	11	47	0.212113	47	1	100	sustainable	11	8	0.265781	36	1	100	dialectical	11	1	0.480769	24	1	100
system	6	47	0.212113	47	1	100	systems	7	8	0.265781	36	1	100	documentary	11	1	0.480769	24	1	100
will	4	47	0.212113	47	1	100	them	4	8	0.265781	36	1	100	due	3	1	0.480769	24	1	100
processes	9	46	0.2076	50	1	100	two	3	8	0.265781	36	1	100	economic	8	1	0.480769	24	1	100
including	9	45	0.203087	51	1	100	zones	5	8	0.265781	36	1	100	elect	5	1	0.480769	24	1	100
effective	9	44	0.198574	52	1	100	about	5	7	0.232558	52	1	100	enjoyment	9	1	0.480769	24	1	100
they	4	44	0.198574	52	1	100	analyze	7	7	0.232558	52	1	100	environmental	13	1	0.480769	24	1	100
effects	7	43	0.194061	54	1	100	better	6	7	0.232558	52	1	100	established	11	1	0.480769	24	1	100
how	3	43	0.194061	54	1	100	case	4	7	0.232558	52	1	100	excluded	8	1	0.480769	24	1	100
when	4	43	0.194061	54	1	100	developed	9	7	0.232558	52	1	100	executed	8	1	0.480769	24	1	100
key	3	42	0.189548	57	1	100	due	3	7	0.232558	52	1	100	explanatory	11	1	0.480769	24	1	100
our	3	42	0.189548	57	1	100	ecology	7	7	0.232558	52	1	100	extractive	10	1	0.480769	24	1	100
policy	6	42	0.189548	57	1	100	influence	9	7	0.232558	52	1	100	fact	4	1	0.480769	24	1	100
resources	9	42	0.189548	57	1	100	legal	5	7	0.232558	52	1	100	family	6	1	0.480769	24	1	100
habitats	8	41	0.185035	61	1	100	most	4	7	0.232558	52	1	100	farming	7	1	0.480769	24	1	100
human	5	41	0.185035	61	1	100	observation	11	7	0.232558	52	1	100	favoring	8	1	0.480769	24	1	100
stakeholder	11	41	0.185035	61	1	100	plans	5	7	0.232558	52	1	100	field	5	1	0.480769	24	1	100
strategies	10	41	0.185035	61	1	100	seascape	8	7	0.232558	52	1	100	findings	8	1	0.480769	24	1	100
case	4	40	0.180522	65	1	100	they	4	7	0.232558	52	1	100	fishing	7	1	0.480769	24	1	100
could	5	40	0.180522	65	1	100	warming	7	7	0.232558	52	1	100	formulation	11	1	0.480769	24	1	100
information	11	40	0.180522	65	1	100	work	4	7	0.232558	52	1	100	found	5	1	0.480769	24	1	100
ing	3	40	0.180522	65	1	100	actors	6	6	0.199336	68	1	100	framework	9	1	0.480769	24	1	100
integrated	10	40	0.180522	65	1	100	analyzed	8	6	0.199336	68	1	100	generates	9	1	0.480769	24	1	100
many	4	40	0.180522	65	1	100	associated	10	6	0.199336	68	1	100	growing	7	1	0.480769	24	1	100
population	10	40	0.180522	65	1	100	common	6	6	0.199336	68	1	100	guide	5	1	0.480769	24	1	100
some	4	40	0.180522	65	1	100	current	7	6	0.199336	68	1	100	guided	6	1	0.480769	24	1	100
existing	8	39	0.176009	73	1	100	design	6	6	0.199336	68	1	100	had	3	1	0.480769	24	1	100
region	6	39	0.176009	73	1	100	divers	6	6	0.199336	68	1	100	historical	10	1	0.480769	24	1	100
sites	5	39	0.176009	73	1	100	factors	7	6	0.199336	68	1	100	historically	12	1	0.480769	24	1	100
support	7	39	0.176009	73	1	100	first	5	6	0.199336	68	1	100	how	3	1	0.480769	24	1	100
take	4	39	0.176009	73	1	100	necessary	9	6	0.199336	68	1	100	human	5	1	0.480769	24	1	100
about	5	38	0.171496	78	1	100	objective	9	6	0.199336	68	1	100	identify	8	1	0.480769	24	1	100
new	3	38	0.171496	78	1	100	present	7	6	0.199336	68	1	100	identifying	11	1	0.480769	24	1	100
two	3	38	0.171496	78	1	100	related	7	6	0.199336	68	1	100	indicate	8	1	0.480769	24	1	100
value	5	38	0.171496	78	1	100	relationship	12	6	0.199336	68	1	100	investigating	13	1	0.480769	24	1	100
analysis	8	37	0.166983	82	1	100	relationships	13	6	0.199336	68	1	100	involvement	11	1	0.480769	24	1	100
current	7	37	0.166983	82	1	100	should	6	6	0.199336	68	1	100	line	4	1	0.480769	24	1	100
under	5	37	0.166983	82	1	100	small_scale	11	6	0.199336	68	1	100	living	6	1	0.480769	24	1	100
well	4	37	0.166983	82	1	100	soil	4	6	0.199336	68	1	100	mainly	6	1	0.480769	24	1	100
effectiveness	13	36	0.16247	86	1	100	studies	7	6	0.199336	68	1	100	mass	4	1	0.480769	24	1	100
framework	9	36	0.16247	86	1	100	territorial	11	6	0.199336	68	1	100	meetings	8	1	0.480769	24	1	100
increase	8	36	0.16247	86	1	100	under	5	6	0.199336	68	1	100	method	6	1	0.480769	24	1	100
time	4	36	0.16247	86	1	100	aims	4	5	0.166113	89	1	100	methodological	14	1	0.480769	24	1	100
approaches	10	35	0.157956	90	1	100	approach	8	5	0.166113	89	1	100	middle	6	1	0.480769	24	1	100
biomass	7	35	0.157956	90	1	100	approaches	10	5	0.166113	89	1	100	model	5	1	0.480769	24	1	100
models	6	35	0.157956	90	1	100	change	6	5	0.166113	89	1	100	motivated	9	1	0.480769	24	1	100
paper	5	35	0.157956	90	1	100	chapter	7	5	0.166113	89	1	100	municipality_of_bragança	24	1	0.480769	24	1	100
across	6	34	0.153443	94	1	100	conflict	8	5	0.166113	89	1	100	nature	6	1	0.480769	24	1	100
critical	8	34	0.153443	94	1	100	ecological	10	5	0.166113	89	1	100	negative	8	1	0.480769	24	1	100
decision	8	34	0.153443	94	1	100	effective	9	5	0.166113	89	1	100	northeastern	12	1	0.480769	24	1	100
environment	11	34	0.153443	94	1	100	environment	11	5	0.166113	89	1	100	notion	6	1	0.480769	24	1	100
challenges	10	33	0.14893	98	1	100	estuary	7	5	0.166113	89	1	100	object	6	1	0.480769	24	1	100
local	5	33	0.14893	98	1	100	following	9	5	0.166113	89	1	100	objective	9	1	0.480769	24	1	100
global	6	32	0.144417	100	1	100	geographic	10	5	0.166113	89	1	100	over	4	1	0.480769	24	1	100
measures	8	32	0.144417	100	1	100	gis	3	5	0.166113	89	1	100	overfishing	11	1	0.480769	24	1	100
provides	8	32	0.144417	100	1	100	governance	10	5	0.166113	89	1	100	participatory	13	1	0.480769	24	1	100
social	6	32	0.144417	100	1	100	identified	10	5	0.166113	89	1	100	policies	8	1	0.480769	24	1	100
changes	7	31	0.139904	104	1	100	importance	10	5	0.166113	89	1	100	polygonal	9	1	0.480769	24	1	100
considered	10	31	0.139904	104	1	100	inside	6	5	0.166113	89	1	100	practiced	9	1	0.480769	24	1	100
factors	7	31	0.139904	104	1	100	laser	5	5	0.166113	89	1	100	predominantly	13	1	0.480769	24	1	100
implementation	14	31	0.139904	104	1	100	law	3	5	0.166113	89	1	100	preparation	11	1	0.480769	24	1	100
need	4	31	0.139904	104	1	100	methodology	11	5	0.166113	89	1	100	presented	9	1	0.480769	24	1	100
priority	8	31	0.139904	104	1	100	need	4	5	0.166113	89	1	100	preservation	12	1	0.480769	24	1	100
spatially	9	31	0.139904	104	1	100	new	3	5	0.166113	89	1	100	problems	8	1	0.480769	24	1	100
zones	5	31	0.139904	104	1	100	offshore	8	5	0.166113	89	1	100	procedures	10	1	0.480769	24	1	100
multiple	8	30	0.135391	112	1	100	order	5	5	0.166113	89	1	100	produced	8	1	0.480769	24	1	100
often	5	30	0.135391	112	1	100	plan	4	5	0.166113	89	1	100	production	10	1	0.480769	24	1	100
performance	11	30	0.135391	112	1	100	potential	9	5	0.166113	89	1	100	promote	7	1	0.480769	24	1	100
provide	7	30	0.135391	112	1	100	problems	8	5	0.166113	89	1	100	protection	10	1	0.480769	24	1	100
connectivity	12	29	0.130878	116	1	100	procedures	10	5	0.166113	89	1	100	qualitative	11	1	0.480769	24	1	100
found	5	29	0.130878	116	1	100	process	7	5	0.166113	89	1	100	reality	7	1	0.480769	24	1	100
governance	10	29	0.130878	116	1	100	programs	8	5	0.166113	89	1	100	reflect	7	1	0.480769	24	1	100
identify	8	29	0.130878	116	1	100	projects	8	5	0.166113	89	1	100	relate	6	1	0.480769	24	1	100
if	2	29	0.130878	116	1	100	protect	7	5	0.166113	89	1	100	relationship	12	1	0.480769	24	1	100
level	5	29	0.130878	116	1	100	regulations	11	5	0.166113	89	1	100	reserve	7	1	0.480769	24	1	100
monitoring	10	29	0.130878	116	1	100	resource	8	5	0.166113	89	1	100	resources	9	1	0.480769	24	1	100
outcomes	8	29	0.130878	116	1	100	sea	3	5	0.166113	89	1	100	scenario	8	1	0.480769	24	1	100
protecting	10	29	0.130878	116	1	100	space	5	5	0.166113	89	1	100	search	6	1	0.480769	24	1	100
reefs	5	29	0.130878	116	1	100	state	5	5	0.166113	89	1	100	several	7	1	0.480769	24	1	100
studies	7	29	0.130878	116	1	100	territory	9	5	0.166113	89	1	100	side	4	1	0.480769	24	1	100
age	3	28	0.126365	127	1	100	understanding	13	5	0.166113	89	1	100	significantly	13	1	0.480769	24	1	100
analyses	8	28	0.126365	127	1	100	application	11	4	0.13289	128	1	100	situ	4	1	0.480769	24	1	100
knowledge	9	28	0.126365	127	1	100	applied	7	4	0.13289	128	1	100	solving	7	1	0.480769	24	1	100
limited	7	28	0.126365	127	1	100	both	4	4	0.13289	128	1	100	some	4	1	0.480769	24	1	100
marxan	6	28	0.126365	127	1	100	brasiléia	9	4	0.13289	128	1	100	sought	6	1	0.480769	24	1	100
national	8	28	0.126365	127	1	100	catarina	8	4	0.13289	128	1	100	state	5	1	0.480769	24	1	100
over	4	28	0.126365	127	1	100	changes	7	4	0.13289	128	1	100	strategy	8	1	0.480769	24	1	100
reserve	7	28	0.126365	127	1	100	characterization	16	4	0.13289	128	1	100	structural	10	1	0.480769	24	1	100
three	5	28	0.126365	127	1	100	climate	7	4	0.13289	128	1	100	subsistence	11	1	0.480769	24	1	100
tool	4	28	0.126365	127	1	100	coast	5	4	0.13289	128	1	100	suffers	7	1	0.480769	24	1	100
although	8	27	0.121852	137	1	100	complexity	10	4	0.13289	128	1	100	suggestions	11	1	0.480769	24	1	100
available	9	27	0.121852	137	1	100	composition	11	4	0.13289	128	1	100	surroundings	12	1	0.480769	24	1	100
better	6	27	0.121852	137	1	100	considered	10	4	0.13289	128	1	100	territory	9	1	0.480769	24	1	100
developed	9	27	0.121852	137	1	100	context	7	4	0.13289	128	1	100	them	4	1	0.480769	24	1	100
importance	10	27	0.121852	137	1	100	cost	4	4	0.13289	128	1	100	therefore	9	1	0.480769	24	1	100
offshore	8	27	0.121852	137	1	100	creation	8	4	0.13289	128	1	100	thesis	6	1	0.480769	24	1	100
resilience	10	27	0.121852	137	1	100	damage	6	4	0.13289	128	1	100	tourists	8	1	0.480769	24	1	100
scenarios	9	27	0.121852	137	1	100	directly	8	4	0.13289	128	1	100	traditional	11	1	0.480769	24	1	100
site	4	27	0.121852	137	1	100	ethnoecology	12	4	0.13289	128	1	100	use	3	1	0.480769	24	1	100
understanding	13	27	0.121852	137	1	100	evaluated	9	4	0.13289	128	1	100	users	5	1	0.480769	24	1	100
assessment	10	26	0.117339	147	1	100	experience	10	4	0.13289	128	1	100	using	5	1	0.480769	24	1	100
associated	10	26	0.117339	147	1	100	experiences	11	4	0.13289	128	1	100	various	7	1	0.480769	24	1	100
california	10	26	0.117339	147	1	100	exposition	10	4	0.13289	128	1	100	well	4	1	0.480769	24	1	100
context	7	26	0.117339	147	1	100	gillnet	7	4	0.13289	128	1	100	when	4	1	0.480769	24	1	100
dynamics	8	26	0.117339	147	1	100	global	6	4	0.13289	128	1	100	workshops	9	1	0.480769	24	1	100
initiative	10	26	0.117339	147	1	100	groups	6	4	0.13289	128	1	100	years	5	1	0.480769	24	1	100
issues	6	26	0.117339	147	1	100	had	3	4	0.13289	128	1	100
life	4	26	0.117339	147	1	100	how	3	4	0.13289	128	1	100
protected	9	26	0.117339	147	1	100	however	7	4	0.13289	128	1	100
small	5	26	0.117339	147	1	100	implementation	14	4	0.13289	128	1	100
term	4	26	0.117339	147	1	100	industrial	10	4	0.13289	128	1	100
would	5	26	0.117339	147	1	100	larvae	6	4	0.13289	128	1	100
abundance	9	25	0.112826	159	1	100	located	7	4	0.13289	128	1	100
activities	10	25	0.112826	159	1	100	method	6	4	0.13289	128	1	100
being	5	25	0.112826	159	1	100	methodological	14	4	0.13289	128	1	100
community	9	25	0.112826	159	1	100	multiple	8	4	0.13289	128	1	100
growth	6	25	0.112826	159	1	100	multiple_use	12	4	0.13289	128	1	100
less	4	25	0.112826	159	1	100	observed	8	4	0.13289	128	1	100
long	4	25	0.112826	159	1	100	our	3	4	0.13289	128	1	100
only	4	25	0.112826	159	1	100	out	3	4	0.13289	128	1	100
principles	10	25	0.112826	159	1	100	over	4	4	0.13289	128	1	100
regional	8	25	0.112826	159	1	100	poor	4	4	0.13289	128	1	100
resource	8	25	0.112826	159	1	100	possible	8	4	0.13289	128	1	100
socioeconomic	13	25	0.112826	159	1	100	practices	9	4	0.13289	128	1	100
specific	8	25	0.112826	159	1	100	priority	8	4	0.13289	128	1	100
structure	9	25	0.112826	159	1	100	products	8	4	0.13289	128	1	100
values	6	25	0.112826	159	1	100	property	8	4	0.13289	128	1	100
years	5	25	0.112826	159	1	100	propose	7	4	0.13289	128	1	100
act	3	24	0.108313	175	1	100	proposed	8	4	0.13289	128	1	100
increasing	10	24	0.108313	175	1	100	public	6	4	0.13289	128	1	100
methods	7	24	0.108313	175	1	100	show	4	4	0.13289	128	1	100
natural	7	24	0.108313	175	1	100	showed	6	4	0.13289	128	1	100
number	6	24	0.108313	175	1	100	shrimp	6	4	0.13289	128	1	100
role	4	24	0.108313	175	1	100	some	4	4	0.13289	128	1	100
set	3	24	0.108313	175	1	100	spatially	9	4	0.13289	128	1	100
significant	11	24	0.108313	175	1	100	specific	8	4	0.13289	128	1	100
address	7	23	0.1038	183	1	100	strategies	10	4	0.13289	128	1	100
cost	4	23	0.1038	183	1	100	studied	7	4	0.13289	128	1	100
costs	5	23	0.1038	183	1	100	sustainability	14	4	0.13289	128	1	100
first	5	23	0.1038	183	1	100	systematic	10	4	0.13289	128	1	100
hotspots	8	23	0.1038	183	1	100	three	5	4	0.13289	128	1	100
identified	10	23	0.1038	183	1	100	tools	5	4	0.13289	128	1	100
land	4	23	0.1038	183	1	100	tourism	7	4	0.13289	128	1	100
multi	5	23	0.1038	183	1	100	trails	6	4	0.13289	128	1	100
services	8	23	0.1038	183	1	100	turtles	7	4	0.13289	128	1	100
systematic	10	23	0.1038	183	1	100	using	5	4	0.13289	128	1	100
those	5	23	0.1038	183	1	100	zone	4	4	0.13289	128	1	100
waters	6	23	0.1038	183	1	100	actions	7	3	0.0996678	194	1	100
complex	7	22	0.0992869	195	1	100	administration	14	3	0.0996678	194	1	100
effort	6	22	0.0992869	195	1	100	airborne	8	3	0.0996678	194	1	100
making	6	22	0.0992869	195	1	100	alternative	11	3	0.0996678	194	1	100
mediterranean	13	22	0.0992869	195	1	100	appropriate	11	3	0.0996678	194	1	100
plans	5	22	0.0992869	195	1	100	article	7	3	0.0996678	194	1	100
related	7	22	0.0992869	195	1	100	authorities	11	3	0.0996678	194	1	100
single	6	22	0.0992869	195	1	100	available	9	3	0.0996678	194	1	100
state	5	22	0.0992869	195	1	100	because	7	3	0.0996678	194	1	100
systems	7	22	0.0992869	195	1	100	bycatch	7	3	0.0996678	194	1	100
target	6	22	0.0992869	195	1	100	categories	10	3	0.0996678	194	1	100
zone	4	22	0.0992869	195	1	100	central	7	3	0.0996678	194	1	100
capacity	8	21	0.0947739	206	1	100	characteristics	15	3	0.0996678	194	1	100
designation	11	21	0.0947739	206	1	100	cluster	7	3	0.0996678	194	1	100
further	7	21	0.0947739	206	1	100	communication	13	3	0.0996678	194	1	100
increases	9	21	0.0947739	206	1	100	composed	8	3	0.0996678	194	1	100
industry	8	21	0.0947739	206	1	100	comprehension	13	3	0.0996678	194	1	100
pelagic	7	21	0.0947739	206	1	100	conditions	10	3	0.0996678	194	1	100
plan	4	21	0.0947739	206	1	100	consider	8	3	0.0996678	194	1	100
populations	11	21	0.0947739	206	1	100	construction	12	3	0.0996678	194	1	100
priorities	10	21	0.0947739	206	1	100	control	7	3	0.0996678	194	1	100
proposed	8	21	0.0947739	206	1	100	cooperation	11	3	0.0996678	194	1	100
provided	8	21	0.0947739	206	1	100	councils	8	3	0.0996678	194	1	100
rather	6	21	0.0947739	206	1	100	decisions	9	3	0.0996678	194	1	100
show	4	21	0.0947739	206	1	100	deforestation	13	3	0.0996678	194	1	100
suitable	8	21	0.0947739	206	1	100	developing	10	3	0.0996678	194	1	100
around	6	20	0.0902609	220	1	100	diagnosis	9	3	0.0996678	194	1	100
benefit	7	20	0.0902609	220	1	100	direct	6	3	0.0996678	194	1	100
commercial	10	20	0.0902609	220	1	100	early	5	3	0.0996678	194	1	100
criteria	8	20	0.0902609	220	1	100	ecosystems	10	3	0.0996678	194	1	100
evaluation	10	20	0.0902609	220	1	100	effects	7	3	0.0996678	194	1	100
fishers	7	20	0.0902609	220	1	100	efficiency	10	3	0.0996678	194	1	100
goals	5	20	0.0902609	220	1	100	effort	6	3	0.0996678	194	1	100
government	10	20	0.0902609	220	1	100	elaboration	11	3	0.0996678	194	1	100
levels	6	20	0.0902609	220	1	100	environments	12	3	0.0996678	194	1	100
managers	8	20	0.0902609	220	1	100	epa	3	3	0.0996678	194	1	100
particularly	12	20	0.0902609	220	1	100	equation	8	3	0.0996678	194	1	100
political	9	20	0.0902609	220	1	100	evaluation	10	3	0.0996678	194	1	100
several	7	20	0.0902609	220	1	100	existing	8	3	0.0996678	194	1	100
actions	7	19	0.0857478	233	1	100	farming	7	3	0.0996678	194	1	100
alternative	11	19	0.0857478	233	1	100	federal_conservation_units	26	3	0.0996678	194	1	100
because	7	19	0.0857478	233	1	100	future	6	3	0.0996678	194	1	100
co	2	19	0.0857478	233	1	100	great	5	3	0.0996678	194	1	100
coast	5	19	0.0857478	233	1	100	growth	6	3	0.0996678	194	1	100
conflict	8	19	0.0857478	233	1	100	identify	8	3	0.0996678	194	1	100
countries	9	19	0.0857478	233	1	100	if	2	3	0.0996678	194	1	100
decisions	9	19	0.0857478	233	1	100	images	6	3	0.0996678	194	1	100
developing	10	19	0.0857478	233	1	100	increase	8	3	0.0996678	194	1	100
diversity	9	19	0.0857478	233	1	100	indemnity	9	3	0.0996678	194	1	100
due	3	19	0.0857478	233	1	100	intensity	9	3	0.0996678	194	1	100
especially	10	19	0.0857478	233	1	100	interaction	11	3	0.0996678	194	1	100
established	11	19	0.0857478	233	1	100	interests	9	3	0.0996678	194	1	100
evidence	8	19	0.0857478	233	1	100	involved	8	3	0.0996678	194	1	100
extent	6	19	0.0857478	233	1	100	keeping	7	3	0.0996678	194	1	100
groups	6	19	0.0857478	233	1	100	lack	4	3	0.0996678	194	1	100
location	8	19	0.0857478	233	1	100	last	4	3	0.0996678	194	1	100
modelling	9	19	0.0857478	233	1	100	limitations	11	3	0.0996678	194	1	100
movement	8	19	0.0857478	233	1	100	loss	4	3	0.0996678	194	1	100
needs	5	19	0.0857478	233	1	100	mca	3	3	0.0996678	194	1	100
outside	7	19	0.0857478	233	1	100	measures	8	3	0.0996678	194	1	100
present	7	19	0.0857478	233	1	100	models	6	3	0.0996678	194	1	100
relative	8	19	0.0857478	233	1	100	morphology	10	3	0.0996678	194	1	100
result	6	19	0.0857478	233	1	100	municipal	9	3	0.0996678	194	1	100
seabird	7	19	0.0857478	233	1	100	obtained	8	3	0.0996678	194	1	100
seas	4	19	0.0857478	233	1	100	ocean	5	3	0.0996678	194	1	100
software	8	19	0.0857478	233	1	100	only	4	3	0.0996678	194	1	100
sustainable	11	19	0.0857478	233	1	100	part	4	3	0.0996678	194	1	100
threats	7	19	0.0857478	233	1	100	points	6	3	0.0996678	194	1	100
adaptive	8	18	0.0812348	262	1	100	policy	6	3	0.0996678	194	1	100
concepts	8	18	0.0812348	262	1	100	population	10	3	0.0996678	194	1	100
conflicts	9	18	0.0812348	262	1	100	presented	9	3	0.0996678	194	1	100
density	7	18	0.0812348	262	1	100	preservation	12	3	0.0996678	194	1	100
distributions	13	18	0.0812348	262	1	100	preserve	8	3	0.0996678	194	1	100
ensure	6	18	0.0812348	262	1	100	processes	9	3	0.0996678	194	1	100
had	3	18	0.0812348	262	1	100	production	10	3	0.0996678	194	1	100
increased	9	18	0.0812348	262	1	100	project	7	3	0.0996678	194	1	100
major	5	18	0.0812348	262	1	100	projected	9	3	0.0996678	194	1	100
predicted	9	18	0.0812348	262	1	100	protected_areas	15	3	0.0996678	194	1	100
protect	7	18	0.0812348	262	1	100	reaching	8	3	0.0996678	194	1	100
risk	4	18	0.0812348	262	1	100	regarding	9	3	0.0996678	194	1	100
scientific	10	18	0.0812348	262	1	100	regimes	7	3	0.0996678	194	1	100
sectoral	8	18	0.0812348	262	1	100	region	6	3	0.0996678	194	1	100
strategic	9	18	0.0812348	262	1	100	residents	9	3	0.0996678	194	1	100
sustainability	14	18	0.0812348	262	1	100	resolution	10	3	0.0996678	194	1	100
terms	5	18	0.0812348	262	1	100	revenue	7	3	0.0996678	194	1	100
thus	4	18	0.0812348	262	1	100	role	4	3	0.0996678	194	1	100
access	6	17	0.0767217	280	1	100	rules	5	3	0.0996678	194	1	100
assess	6	17	0.0767217	280	1	100	rw	2	3	0.0996678	194	1	100
canada	6	17	0.0767217	280	1	100	scanning	8	3	0.0996678	194	1	100
catch	5	17	0.0767217	280	1	100	scientific	10	3	0.0996678	194	1	100
closures	8	17	0.0767217	280	1	100	second	6	3	0.0996678	194	1	100
designing	9	17	0.0767217	280	1	100	society	7	3	0.0996678	194	1	100
dynamic	7	17	0.0767217	280	1	100	southern	8	3	0.0996678	194	1	100
efforts	7	17	0.0767217	280	1	100	stages	6	3	0.0996678	194	1	100
group	5	17	0.0767217	280	1	100	strategy	8	3	0.0996678	194	1	100
here	4	17	0.0767217	280	1	100	subject	7	3	0.0996678	194	1	100
implementing	12	17	0.0767217	280	1	100	subsidies	9	3	0.0996678	194	1	100
include	7	17	0.0767217	280	1	100	support	7	3	0.0996678	194	1	100
islands	7	17	0.0767217	280	1	100	targets	7	3	0.0996678	194	1	100
mlpa	4	17	0.0767217	280	1	100	therefore	9	3	0.0996678	194	1	100
oceans	6	17	0.0767217	280	1	100	thermal	7	3	0.0996678	194	1	100
particular	10	17	0.0767217	280	1	100	transformation	14	3	0.0996678	194	1	100
public	6	17	0.0767217	280	1	100	types	5	3	0.0996678	194	1	100
review	6	17	0.0767217	280	1	100	understand	10	3	0.0996678	194	1	100
so	2	17	0.0767217	280	1	100	universal	9	3	0.0996678	194	1	100
source	6	17	0.0767217	280	1	100	urban	5	3	0.0996678	194	1	100
strategy	8	17	0.0767217	280	1	100	variation	9	3	0.0996678	194	1	100
success	7	17	0.0767217	280	1	100	verify	6	3	0.0996678	194	1	100
therefore	9	17	0.0767217	280	1	100	view	4	3	0.0996678	194	1	100
world	5	17	0.0767217	280	1	100	way	3	3	0.0996678	194	1	100
blue	4	16	0.0722087	304	1	100	well	4	3	0.0996678	194	1	100
communities	11	16	0.0722087	304	1	100	accomplished	12	2	0.0664452	305	1	100
conditions	10	16	0.0722087	304	1	100	achieved	8	2	0.0664452	305	1	100
establishment	13	16	0.0722087	304	1	100	activities	10	2	0.0664452	305	1	100
example	7	16	0.0722087	304	1	100	acute	5	2	0.0664452	305	1	100
fishes	6	16	0.0722087	304	1	100	additional	10	2	0.0664452	305	1	100
focus	5	16	0.0722087	304	1	100	administrative	14	2	0.0664452	305	1	100
focused	7	16	0.0722087	304	1	100	affects	7	2	0.0664452	305	1	100
greater	7	16	0.0722087	304	1	100	agency	6	2	0.0664452	305	1	100
meet	4	16	0.0722087	304	1	100	aim	3	2	0.0664452	305	1	100
needed	6	16	0.0722087	304	1	100	although	8	2	0.0664452	305	1	100
overall	7	16	0.0722087	304	1	100	amazon	6	2	0.0664452	305	1	100
prioritization	14	16	0.0722087	304	1	100	applicability	13	2	0.0664452	305	1	100
regions	7	16	0.0722087	304	1	100	applying	8	2	0.0664452	305	1	100
regulations	11	16	0.0722087	304	1	100	aspects	7	2	0.0664452	305	1	100
whether	7	16	0.0722087	304	1	100	assess	6	2	0.0664452	305	1	100
account	7	15	0.0676956	320	1	100	assessing	9	2	0.0664452	305	1	100
accounting	10	15	0.0676956	320	1	100	attractions	11	2	0.0664452	305	1	100
achieve	7	15	0.0676956	320	1	100	biology	7	2	0.0664452	305	1	100
activity	8	15	0.0676956	320	1	100	boats	5	2	0.0664452	305	1	100
addition	8	15	0.0676956	320	1	100	br_101	6	2	0.0664452	305	1	100
best	4	15	0.0676956	320	1	100	building	8	2	0.0664452	305	1	100
despite	7	15	0.0676956	320	1	100	capture	7	2	0.0664452	305	1	100
effect	6	15	0.0676956	320	1	100	carried	7	2	0.0664452	305	1	100
features	8	15	0.0676956	320	1	100	chronic	7	2	0.0664452	305	1	100
fully	5	15	0.0676956	320	1	100	city	4	2	0.0664452	305	1	100
given	5	15	0.0676956	320	1	100	civil	5	2	0.0664452	305	1	100
grounds	7	15	0.0676956	320	1	100	collaboration	13	2	0.0664452	305	1	100
improve	7	15	0.0676956	320	1	100	collect	7	2	0.0664452	305	1	100
individual	10	15	0.0676956	320	1	100	combined	8	2	0.0664452	305	1	100
influence	9	15	0.0676956	320	1	100	commitments	11	2	0.0664452	305	1	100
integration	11	15	0.0676956	320	1	100	complementary	13	2	0.0664452	305	1	100
interests	9	15	0.0676956	320	1	100	complemented	12	2	0.0664452	305	1	100
likely	6	15	0.0676956	320	1	100	compose	7	2	0.0664452	305	1	100
managing	8	15	0.0676956	320	1	100	conceptual	10	2	0.0664452	305	1	100
pasi	4	15	0.0676956	320	1	100	conclusion	10	2	0.0664452	305	1	100
patterns	8	15	0.0676956	320	1	100	consequences	12	2	0.0664452	305	1	100
resulting	9	15	0.0676956	320	1	100	considering	11	2	0.0664452	305	1	100
rules	5	15	0.0676956	320	1	100	consolidated	12	2	0.0664452	305	1	100
science	7	15	0.0676956	320	1	100	contexts	8	2	0.0664452	305	1	100
seasonal	8	15	0.0676956	320	1	100	contribute	10	2	0.0664452	305	1	100
setting	7	15	0.0676956	320	1	100	contribution	12	2	0.0664452	305	1	100
similar	7	15	0.0676956	320	1	100	crisis	6	2	0.0664452	305	1	100
throughout	10	15	0.0676956	320	1	100	database	8	2	0.0664452	305	1	100
towards	7	15	0.0676956	320	1	100	degradation	11	2	0.0664452	305	1	100
trade	5	15	0.0676956	320	1	100	demonstrated	12	2	0.0664452	305	1	100
uncertainty	11	15	0.0676956	320	1	100	derived	7	2	0.0664452	305	1	100
achieving	9	14	0.0631826	351	1	100	describe	8	2	0.0664452	305	1	100
additional	10	14	0.0631826	351	1	100	detecting	9	2	0.0664452	305	1	100
application	11	14	0.0631826	351	1	100	determine	9	2	0.0664452	305	1	100
benthic	7	14	0.0631826	351	1	100	digital	7	2	0.0664452	305	1	100
beyond	6	14	0.0631826	351	1	100	dimension	9	2	0.0664452	305	1	100
building	8	14	0.0631826	351	1	100	directives	10	2	0.0664452	305	1	100
consequences	12	14	0.0631826	351	1	100	discuss	7	2	0.0664452	305	1	100
designed	8	14	0.0631826	351	1	100	dissertation	12	2	0.0664452	305	1	100
differences	11	14	0.0631826	351	1	100	disturbances	12	2	0.0664452	305	1	100
disturbances	12	14	0.0631826	351	1	100	during	6	2	0.0664452	305	1	100
geographic	10	14	0.0631826	351	1	100	ecodevelopment	14	2	0.0664452	305	1	100
help	4	14	0.0631826	351	1	100	ecoturism	9	2	0.0664452	305	1	100
highly	6	14	0.0631826	351	1	100	effectiveness	13	2	0.0664452	305	1	100
identification	14	14	0.0631826	351	1	100	efforts	7	2	0.0664452	305	1	100
inform	6	14	0.0631826	351	1	100	egg	3	2	0.0664452	305	1	100
international	13	14	0.0631826	351	1	100	eggs	4	2	0.0664452	305	1	100
managed	7	14	0.0631826	351	1	100	elements	8	2	0.0664452	305	1	100
maps	4	14	0.0631826	351	1	100	empirical	9	2	0.0664452	305	1	100
non	3	14	0.0631826	351	1	100	enable	6	2	0.0664452	305	1	100
out	3	14	0.0631826	351	1	100	entire	6	2	0.0664452	305	1	100
seabirds	8	14	0.0631826	351	1	100	erosion	7	2	0.0664452	305	1	100
selection	9	14	0.0631826	351	1	100	erosive	7	2	0.0664452	305	1	100
shelf	5	14	0.0631826	351	1	100	essential	9	2	0.0664452	305	1	100
simulations	11	14	0.0631826	351	1	100	established	11	2	0.0664452	305	1	100
southern	8	14	0.0631826	351	1	100	establishing	12	2	0.0664452	305	1	100
successful	10	14	0.0631826	351	1	100	estuarine	9	2	0.0664452	305	1	100
suitability	11	14	0.0631826	351	1	100	even	4	2	0.0664452	305	1	100
trophic	7	14	0.0631826	351	1	100	events	6	2	0.0664452	305	1	100
allow	5	13	0.0586696	379	1	100	factor	6	2	0.0664452	305	1	100
applied	7	13	0.0586696	379	1	100	features	8	2	0.0664452	305	1	100
broader	7	13	0.0586696	379	1	100	few	3	2	0.0664452	305	1	100
central	7	13	0.0586696	379	1	100	field	5	2	0.0664452	305	1	100
compliance	10	13	0.0586696	379	1	100	finally	7	2	0.0664452	305	1	100
connections	11	13	0.0586696	379	1	100	financial	9	2	0.0664452	305	1	100
decline	7	13	0.0586696	379	1	100	findings	8	2	0.0664452	305	1	100
deep	4	13	0.0586696	379	1	100	fishes	6	2	0.0664452	305	1	100
did	3	13	0.0586696	379	1	100	flaws	5	2	0.0664452	305	1	100
evaluate	8	13	0.0586696	379	1	100	focus	5	2	0.0664452	305	1	100
even	4	13	0.0586696	379	1	100	focusing	8	2	0.0664452	305	1	100
experience	10	13	0.0586696	379	1	100	foreseen	8	2	0.0664452	305	1	100
explicit	8	13	0.0586696	379	1	100	form	4	2	0.0664452	305	1	100
exploited	9	13	0.0586696	379	1	100	fragility	9	2	0.0664452	305	1	100
findings	8	13	0.0586696	379	1	100	francisco	9	2	0.0664452	305	1	100
growing	7	13	0.0586696	379	1	100	free	4	2	0.0664452	305	1	100
identifying	11	13	0.0586696	379	1	100	full	4	2	0.0664452	305	1	100
implemented	11	13	0.0586696	379	1	100	gathered	8	2	0.0664452	305	1	100
included	8	13	0.0586696	379	1	100	general	7	2	0.0664452	305	1	100
increasingly	12	13	0.0586696	379	1	100	geodiversity	12	2	0.0664452	305	1	100
indicate	8	13	0.0586696	379	1	100	government	10	2	0.0664452	305	1	100
literature	10	13	0.0586696	379	1	100	governmental	12	2	0.0664452	305	1	100
made	4	13	0.0586696	379	1	100	guarantee	9	2	0.0664452	305	1	100
method	6	13	0.0586696	379	1	100	guides	6	2	0.0664452	305	1	100
open	4	13	0.0586696	379	1	100	higher	6	2	0.0664452	305	1	100
optimal	7	13	0.0586696	379	1	100	highest	7	2	0.0664452	305	1	100
order	5	13	0.0586696	379	1	100	highlighting	12	2	0.0664452	305	1	100
poor	4	13	0.0586696	379	1	100	historical	10	2	0.0664452	305	1	100
possible	8	13	0.0586696	379	1	100	hypothesis	10	2	0.0664452	305	1	100
representation	14	13	0.0586696	379	1	100	improve	7	2	0.0664452	305	1	100
responses	9	13	0.0586696	379	1	100	improvement	11	2	0.0664452	305	1	100
scales	6	13	0.0586696	379	1	100	improving	9	2	0.0664452	305	1	100
significantly	13	13	0.0586696	379	1	100	incidental	10	2	0.0664452	305	1	100
status	6	13	0.0586696	379	1	100	include	7	2	0.0664452	305	1	100
suggest	7	13	0.0586696	379	1	100	includes	8	2	0.0664452	305	1	100
survey	6	13	0.0586696	379	1	100	incorporates	12	2	0.0664452	305	1	100
useful	6	13	0.0586696	379	1	100	increasing	10	2	0.0664452	305	1	100
agencies	8	12	0.0541565	416	1	100	individual	10	2	0.0664452	305	1	100
aim	3	12	0.0541565	416	1	100	institutional	13	2	0.0664452	305	1	100
assessed	8	12	0.0541565	416	1	100	institutions	12	2	0.0664452	305	1	100
bay	3	12	0.0541565	416	1	100	instrument	10	2	0.0664452	305	1	100
boundaries	10	12	0.0541565	416	1	100	instruments	11	2	0.0664452	305	1	100
capital	7	12	0.0541565	416	1	100	integration	11	2	0.0664452	305	1	100
combined	8	12	0.0541565	416	1	100	interfaces	10	2	0.0664452	305	1	100
consider	8	12	0.0541565	416	1	100	international	13	2	0.0664452	305	1	100
considering	11	12	0.0541565	416	1	100	intervention	12	2	0.0664452	305	1	100
contribute	10	12	0.0541565	416	1	100	issues	6	2	0.0664452	305	1	100
ct	2	12	0.0541565	416	1	100	km²	3	2	0.0664452	305	1	100
currently	9	12	0.0541565	416	1	100	lagoon	6	2	0.0664452	305	1	100
demonstrate	11	12	0.0541565	416	1	100	landscapes	10	2	0.0664452	305	1	100
depend	6	12	0.0541565	416	1	100	leadership	10	2	0.0664452	305	1	100
designated	10	12	0.0541565	416	1	100	led	3	2	0.0664452	305	1	100
empirical	9	12	0.0541565	416	1	100	legislation	11	2	0.0664452	305	1	100
energy	6	12	0.0541565	416	1	100	legislative	11	2	0.0664452	305	1	100
establishing	12	12	0.0541565	416	1	100	level	5	2	0.0664452	305	1	100
examined	8	12	0.0541565	416	1	100	licensing	9	2	0.0664452	305	1	100
explore	7	12	0.0541565	416	1	100	literature	10	2	0.0664452	305	1	100
few	3	12	0.0541565	416	1	100	make	4	2	0.0664452	305	1	100
fishermen	9	12	0.0541565	416	1	100	making	6	2	0.0664452	305	1	100
furthermore	11	12	0.0541565	416	1	100	managers	8	2	0.0664452	305	1	100
gaps	4	12	0.0541565	416	1	100	maps	4	2	0.0664452	305	1	100
integrate	9	12	0.0541565	416	1	100	marxan	6	2	0.0664452	305	1	100
interactions	12	12	0.0541565	416	1	100	meters	6	2	0.0664452	305	1	100
lack	4	12	0.0541565	416	1	100	methodologies	13	2	0.0664452	305	1	100
maximum	7	12	0.0541565	416	1	100	model	5	2	0.0664452	305	1	100
new_zealand	11	12	0.0541565	416	1	100	msp	3	2	0.0664452	305	1	100
north	5	12	0.0541565	416	1	100	multi_legislative	17	2	0.0664452	305	1	100
options	7	12	0.0541565	416	1	100	needs	5	2	0.0664452	305	1	100
part	4	12	0.0541565	416	1	100	neglect	7	2	0.0664452	305	1	100
production	10	12	0.0541565	416	1	100	nets	4	2	0.0664452	305	1	100
progress	8	12	0.0541565	416	1	100	networks	8	2	0.0664452	305	1	100
quantitative	12	12	0.0541565	416	1	100	norms	5	2	0.0664452	305	1	100
remain	6	12	0.0541565	416	1	100	obligation	10	2	0.0664452	305	1	100
resolution	10	12	0.0541565	416	1	100	obtaining	9	2	0.0664452	305	1	100
scenario	8	12	0.0541565	416	1	100	official	8	2	0.0664452	305	1	100
socio	5	12	0.0541565	416	1	100	open	4	2	0.0664452	305	1	100
temporal	8	12	0.0541565	416	1	100	operational	11	2	0.0664452	305	1	100
triangle	8	12	0.0541565	416	1	100	opportunity	11	2	0.0664452	305	1	100
types	5	12	0.0541565	416	1	100	outcomes	8	2	0.0664452	305	1	100
uk	2	12	0.0541565	416	1	100	paradox	7	2	0.0664452	305	1	100
user	4	12	0.0541565	416	1	100	participative	13	2	0.0664452	305	1	100
variables	9	12	0.0541565	416	1	100	particularly	12	2	0.0664452	305	1	100
various	7	12	0.0541565	416	1	100	patos	5	2	0.0664452	305	1	100
way	3	12	0.0541565	416	1	100	perceived	9	2	0.0664452	305	1	100
ability	7	11	0.0496435	463	1	100	perspective	11	2	0.0664452	305	1	100
adaptation	10	11	0.0496435	463	1	100	pessimistic	11	2	0.0664452	305	1	100
advice	6	11	0.0496435	463	1	100	phenomena	9	2	0.0664452	305	1	100
any	3	11	0.0496435	463	1	100	physical	8	2	0.0664452	305	1	100
article	7	11	0.0496435	463	1	100	point	5	2	0.0664452	305	1	100
assumptions	11	11	0.0496435	463	1	100	policies	8	2	0.0664452	305	1	100
common	6	11	0.0496435	463	1	100	political	9	2	0.0664452	305	1	100
enhance	7	11	0.0496435	463	1	100	practice	8	2	0.0664452	305	1	100
exposure	8	11	0.0496435	463	1	100	presents	8	2	0.0664452	305	1	100
facilitate	10	11	0.0496435	463	1	100	prevent	7	2	0.0664452	305	1	100
fished	6	11	0.0496435	463	1	100	previous	8	2	0.0664452	305	1	100
foraging	8	11	0.0496435	463	1	100	profiles	8	2	0.0664452	305	1	100
four	4	11	0.0496435	463	1	100	prohibited	10	2	0.0664452	305	1	100
function	8	11	0.0496435	463	1	100	promote	7	2	0.0664452	305	1	100
ges	3	11	0.0496435	463	1	100	proposal	8	2	0.0664452	305	1	100
gis	3	11	0.0496435	463	1	100	qualitative	11	2	0.0664452	305	1	100
km	2	11	0.0496435	463	1	100	quality	7	2	0.0664452	305	1	100
least	5	11	0.0496435	463	1	100	rate	4	2	0.0664452	305	1	100
must	4	11	0.0496435	463	1	100	recent	6	2	0.0664452	305	1	100
now	3	11	0.0496435	463	1	100	recommendations	15	2	0.0664452	305	1	100
occur	5	11	0.0496435	463	1	100	recreational	12	2	0.0664452	305	1	100
opportunity	11	11	0.0496435	463	1	100	reduce	6	2	0.0664452	305	1	100
participation	13	11	0.0496435	463	1	100	reducing	8	2	0.0664452	305	1	100
positive	8	11	0.0496435	463	1	100	reefs	5	2	0.0664452	305	1	100
practices	9	11	0.0496435	463	1	100	relevant	8	2	0.0664452	305	1	100
predictions	11	11	0.0496435	463	1	100	repair	6	2	0.0664452	305	1	100
preferences	11	11	0.0496435	463	1	100	repairing	9	2	0.0664452	305	1	100
questions	9	11	0.0496435	463	1	100	resilience	10	2	0.0664452	305	1	100
realities	9	11	0.0496435	463	1	100	responsibility	14	2	0.0664452	305	1	100
reduce	6	11	0.0496435	463	1	100	restricted	10	2	0.0664452	305	1	100
relevant	8	11	0.0496435	463	1	100	restrictions	12	2	0.0664452	305	1	100
represent	9	11	0.0496435	463	1	100	right	5	2	0.0664452	305	1	100
required	8	11	0.0496435	463	1	100	river	5	2	0.0664452	305	1	100
response	8	11	0.0496435	463	1	100	roads	5	2	0.0664452	305	1	100
rights	6	11	0.0496435	463	1	100	scaling	7	2	0.0664452	305	1	100
sex	3	11	0.0496435	463	1	100	scanner	7	2	0.0664452	305	1	100
showed	6	11	0.0496435	463	1	100	scenario	8	2	0.0664452	305	1	100
targeted	8	11	0.0496435	463	1	100	scenarios	9	2	0.0664452	305	1	100
then	4	11	0.0496435	463	1	100	science	7	2	0.0664452	305	1	100
threatened	10	11	0.0496435	463	1	100	scuba	5	2	0.0664452	305	1	100
type	4	11	0.0496435	463	1	100	section	7	2	0.0664452	305	1	100
variability	11	11	0.0496435	463	1	100	sections	8	2	0.0664452	305	1	100
vulnerability	13	11	0.0496435	463	1	100	simulation	10	2	0.0664452	305	1	100
water	5	11	0.0496435	463	1	100	socioeconomic	13	2	0.0664452	305	1	100
accuracy	8	10	0.0451304	507	1	100	spaces	6	2	0.0664452	305	1	100
achieved	8	10	0.0451304	507	1	100	spatiality	10	2	0.0664452	305	1	100
addressing	10	10	0.0451304	507	1	100	species	7	2	0.0664452	305	1	100
appropriate	11	10	0.0451304	507	1	100	starting	8	2	0.0664452	305	1	100
atlantic	8	10	0.0451304	507	1	100	step	4	2	0.0664452	305	1	100
basis	5	10	0.0451304	507	1	100	stress	6	2	0.0664452	305	1	100
challenge	9	10	0.0451304	507	1	100	structural	10	2	0.0664452	305	1	100
changing	8	10	0.0451304	507	1	100	structure	9	2	0.0664452	305	1	100
clear	5	10	0.0451304	507	1	100	suggests	8	2	0.0664452	305	1	100
complexity	10	10	0.0451304	507	1	100	supporting	10	2	0.0664452	305	1	100
component	9	10	0.0451304	507	1	100	target	6	2	0.0664452	305	1	100
comprehensive	13	10	0.0451304	507	1	100	technical	9	2	0.0664452	305	1	100
considerations	14	10	0.0451304	507	1	100	technology	10	2	0.0664452	305	1	100
consistent	10	10	0.0451304	507	1	100	theory	6	2	0.0664452	305	1	100
contribution	12	10	0.0451304	507	1	100	thermal_stress	14	2	0.0664452	305	1	100
demonstrates	12	10	0.0451304	507	1	100	those	5	2	0.0664452	305	1	100
derived	7	10	0.0451304	507	1	100	thus	4	2	0.0664452	305	1	100
dimensions	10	10	0.0451304	507	1	100	time	4	2	0.0664452	305	1	100
discussed	9	10	0.0451304	507	1	100	tool	4	2	0.0664452	305	1	100
displacement	12	10	0.0451304	507	1	100	topographic	11	2	0.0664452	305	1	100
diverse	7	10	0.0451304	507	1	100	topographical	13	2	0.0664452	305	1	100
ecologically	12	10	0.0451304	507	1	100	transformations	15	2	0.0664452	305	1	100
effectively	11	10	0.0451304	507	1	100	transparency	12	2	0.0664452	305	1	100
essential	9	10	0.0451304	507	1	100	trend	5	2	0.0664452	305	1	100
estimates	9	10	0.0451304	507	1	100	units	5	2	0.0664452	305	1	100
exclusive	9	10	0.0451304	507	1	100	upper_medium	12	2	0.0664452	305	1	100
finally	7	10	0.0451304	507	1	100	viability	9	2	0.0664452	305	1	100
following	9	10	0.0451304	507	1	100	visibility	10	2	0.0664452	305	1	100
general	7	10	0.0451304	507	1	100	welfare	7	2	0.0664452	305	1	100
great	5	10	0.0451304	507	1	100	whale	5	2	0.0664452	305	1	100
gulf	4	10	0.0451304	507	1	100	will	4	2	0.0664452	305	1	100
harvest	7	10	0.0451304	507	1	100	world	5	2	0.0664452	305	1	100
health	6	10	0.0451304	507	1	100	would	5	2	0.0664452	305	1	100
improving	9	10	0.0451304	507	1	100	years	5	2	0.0664452	305	1	100
initiatives	11	10	0.0451304	507	1	100	_sp	3	1	0.0332226	541	1	100
leading	7	10	0.0451304	507	1	100	’s	2	1	0.0332226	541	1	100
make	4	10	0.0451304	507	1	100	15th	4	1	0.0332226	541	1	100
map	3	10	0.0451304	507	1	100	3d	2	1	0.0332226	541	1	100
mapping	7	10	0.0451304	507	1	100	abiotic	7	1	0.0332226	541	1	100
might	5	10	0.0451304	507	1	100	able	4	1	0.0332226	541	1	100
mofs	4	10	0.0451304	507	1	100	abstracts	9	1	0.0332226	541	1	100
near	4	10	0.0451304	507	1	100	acceptable	10	1	0.0332226	541	1	100
negative	8	10	0.0451304	507	1	100	access	6	1	0.0332226	541	1	100
objective	9	10	0.0451304	507	1	100	accounting	10	1	0.0332226	541	1	100
offs	4	10	0.0451304	507	1	100	accumulated	11	1	0.0332226	541	1	100
opportunities	13	10	0.0451304	507	1	100	achieve	7	1	0.0332226	541	1	100
place	5	10	0.0451304	507	1	100	achieving	9	1	0.0332226	541	1	100
point	5	10	0.0451304	507	1	100	across	6	1	0.0332226	541	1	100
port	4	10	0.0451304	507	1	100	action	6	1	0.0332226	541	1	100
potentially	11	10	0.0451304	507	1	100	actually	8	1	0.0332226	541	1	100
practice	8	10	0.0451304	507	1	100	adapt	5	1	0.0332226	541	1	100
presence	8	10	0.0451304	507	1	100	addition	8	1	0.0332226	541	1	100
presented	9	10	0.0451304	507	1	100	addressing	10	1	0.0332226	541	1	100
pressure	8	10	0.0451304	507	1	100	adds	4	1	0.0332226	541	1	100
productivity	12	10	0.0451304	507	1	100	adequate	8	1	0.0332226	541	1	100
recommendations	15	10	0.0451304	507	1	100	admitting	9	1	0.0332226	541	1	100
recovery	8	10	0.0451304	507	1	100	adults	6	1	0.0332226	541	1	100
reduced	7	10	0.0451304	507	1	100	aerial	6	1	0.0332226	541	1	100
representative	14	10	0.0451304	507	1	100	aesthetic	9	1	0.0332226	541	1	100
require	7	10	0.0451304	507	1	100	affront	7	1	0.0332226	541	1	100
requires	8	10	0.0451304	507	1	100	again	5	1	0.0332226	541	1	100
same	4	10	0.0451304	507	1	100	against	7	1	0.0332226	541	1	100
scientists	10	10	0.0451304	507	1	100	agencies	8	1	0.0332226	541	1	100
simple	6	10	0.0451304	507	1	100	aggravating	11	1	0.0332226	541	1	100
specifically	12	10	0.0451304	507	1	100	aggregation	11	1	0.0332226	541	1	100
stocks	6	10	0.0451304	507	1	100	agronomy	8	1	0.0332226	541	1	100
suggests	8	10	0.0451304	507	1	100	aimed	5	1	0.0332226	541	1	100
them	4	10	0.0451304	507	1	100	aiming	6	1	0.0332226	541	1	100
together	8	10	0.0451304	507	1	100	allocating	10	1	0.0332226	541	1	100
top	3	10	0.0451304	507	1	100	allowed	7	1	0.0332226	541	1	100
toward	6	10	0.0451304	507	1	100	almost	6	1	0.0332226	541	1	100
west	4	10	0.0451304	507	1	100	along	5	1	0.0332226	541	1	100
what	4	10	0.0451304	507	1	100	already	7	1	0.0332226	541	1	100
wind	4	10	0.0451304	507	1	100	alternatives	12	1	0.0332226	541	1	100
action	6	9	0.0406174	581	1	100	altimetry	9	1	0.0332226	541	1	100
affect	6	9	0.0406174	581	1	100	always	6	1	0.0332226	541	1	100
after	5	9	0.0406174	581	1	100	ambient	7	1	0.0332226	541	1	100
against	7	9	0.0406174	581	1	100	amongst	7	1	0.0332226	541	1	100
aggregations	12	9	0.0406174	581	1	100	analyse	7	1	0.0332226	541	1	100
appear	6	9	0.0406174	581	1	100	analyses	8	1	0.0332226	541	1	100
aspects	7	9	0.0406174	581	1	100	analytical	10	1	0.0332226	541	1	100
assessing	9	9	0.0406174	581	1	100	analyzing	9	1	0.0332226	541	1	100
barrier	7	9	0.0406174	581	1	100	anhatomirim_environmental_protection_area	41	1	0.0332226	541	1	100
become	6	9	0.0406174	581	1	100	antônio	7	1	0.0332226	541	1	100
broad	5	9	0.0406174	581	1	100	apa_marinha	11	1	0.0332226	541	1	100
characteristics	15	9	0.0406174	581	1	100	appears	7	1	0.0332226	541	1	100
classes	7	9	0.0406174	581	1	100	applicable	10	1	0.0332226	541	1	100
country	7	9	0.0406174	581	1	100	approximately	13	1	0.0332226	541	1	100
datasets	8	9	0.0406174	581	1	100	aptitude	8	1	0.0332226	541	1	100
demographic	11	9	0.0406174	581	1	100	aquaculture	11	1	0.0332226	541	1	100
designs	7	9	0.0406174	581	1	100	aquatic	7	1	0.0332226	541	1	100
down	4	9	0.0406174	581	1	100	argued	6	1	0.0332226	541	1	100
during	6	9	0.0406174	581	1	100	arising	7	1	0.0332226	541	1	100
examine	7	9	0.0406174	581	1	100	around	6	1	0.0332226	541	1	100
expected	8	9	0.0406174	581	1	100	arrangement	11	1	0.0332226	541	1	100
exploitation	12	9	0.0406174	581	1	100	aspect	6	1	0.0332226	541	1	100
fisher	6	9	0.0406174	581	1	100	assessed	8	1	0.0332226	541	1	100
five	4	9	0.0406174	581	1	100	atlantic	8	1	0.0332226	541	1	100
functional	10	9	0.0406174	581	1	100	atmosphere	10	1	0.0332226	541	1	100
gear	4	9	0.0406174	581	1	100	attempt	7	1	0.0332226	541	1	100
highlighted	11	9	0.0406174	581	1	100	attempts	8	1	0.0332226	541	1	100
improved	8	9	0.0406174	581	1	100	attended	8	1	0.0332226	541	1	100
influenced	10	9	0.0406174	581	1	100	audits	6	1	0.0332226	541	1	100
iucn	4	9	0.0406174	581	1	100	authors	7	1	0.0332226	541	1	100
legal	5	9	0.0406174	581	1	100	automatically	13	1	0.0332226	541	1	100
leisure	7	9	0.0406174	581	1	100	avoid	5	1	0.0332226	541	1	100
limitations	11	9	0.0406174	581	1	100	aware	5	1	0.0332226	541	1	100
lyme	4	9	0.0406174	581	1	100	bahia	5	1	0.0332226	541	1	100
marine_map	10	9	0.0406174	581	1	100	baía	4	1	0.0332226	541	1	100
metrics	7	9	0.0406174	581	1	100	baleia	6	1	0.0332226	541	1	100
much	4	9	0.0406174	581	1	100	baleia_franca_environmental_	28	1	0.0332226	541	1	100
nature	6	9	0.0406174	581	1	100	balneário_camboriú	18	1	0.0332226	541	1	100
necessary	9	9	0.0406174	581	1	100	basis	5	1	0.0332226	541	1	100
older	5	9	0.0406174	581	1	100	beauties	8	1	0.0332226	541	1	100
organizations	13	9	0.0406174	581	1	100	bedding	7	1	0.0332226	541	1	100
persistence	11	9	0.0406174	581	1	100	being	5	1	0.0332226	541	1	100
profits	7	9	0.0406174	581	1	100	believe	7	1	0.0332226	541	1	100
qualitative	11	9	0.0406174	581	1	100	believes	8	1	0.0332226	541	1	100
rapid	5	9	0.0406174	581	1	100	benefits	8	1	0.0332226	541	1	100
rapidly	7	9	0.0406174	581	1	100	besides	7	1	0.0332226	541	1	100
recently	8	9	0.0406174	581	1	100	beyond	6	1	0.0332226	541	1	100
recreation	10	9	0.0406174	581	1	100	biophysical	11	1	0.0332226	541	1	100
recreational	12	9	0.0406174	581	1	100	blunting	8	1	0.0332226	541	1	100
regime	6	9	0.0406174	581	1	100	branches	8	1	0.0332226	541	1	100
relatively	10	9	0.0406174	581	1	100	brasília	8	1	0.0332226	541	1	100
restricted	10	9	0.0406174	581	1	100	brought	7	1	0.0332226	541	1	100
risks	5	9	0.0406174	581	1	100	bureaucratic	12	1	0.0332226	541	1	100
saba	4	9	0.0406174	581	1	100	caiçara	7	1	0.0332226	541	1	100
sanctuary	9	9	0.0406174	581	1	100	camboriu	8	1	0.0332226	541	1	100
series	6	9	0.0406174	581	1	100	capacitate	10	1	0.0332226	541	1	100
sponge	6	9	0.0406174	581	1	100	carciniculture	14	1	0.0332226	541	1	100
strong	6	9	0.0406174	581	1	100	cases	5	1	0.0332226	541	1	100
structured	10	9	0.0406174	581	1	100	catch	5	1	0.0332226	541	1	100
subsequent	10	9	0.0406174	581	1	100	catches	7	1	0.0332226	541	1	100
surrounding	11	9	0.0406174	581	1	100	centers	7	1	0.0332226	541	1	100
taiwan	6	9	0.0406174	581	1	100	central_south	13	1	0.0332226	541	1	100
temperature	11	9	0.0406174	581	1	100	centralize	10	1	0.0332226	541	1	100
thermal	7	9	0.0406174	581	1	100	century	7	1	0.0332226	541	1	100
ultimately	10	9	0.0406174	581	1	100	cf	2	1	0.0332226	541	1	100
understand	10	9	0.0406174	581	1	100	chapters	8	1	0.0332226	541	1	100
urchin	6	9	0.0406174	581	1	100	characterize	12	1	0.0332226	541	1	100
whereas	7	9	0.0406174	581	1	100	characterizing	14	1	0.0332226	541	1	100
adriatic	8	8	0.0361043	649	1	100	charts	6	1	0.0332226	541	1	100
adult	5	8	0.0361043	649	1	100	chemical	8	1	0.0332226	541	1	100
allowed	7	8	0.0361043	649	1	100	citizen	7	1	0.0332226	541	1	100
allowing	8	8	0.0361043	649	1	100	classification	14	1	0.0332226	541	1	100
assessments	11	8	0.0361043	649	1	100	classified	10	1	0.0332226	541	1	100
australia	9	8	0.0361043	649	1	100	clear	5	1	0.0332226	541	1	100
average	7	8	0.0361043	649	1	100	close	5	1	0.0332226	541	1	100
china	5	8	0.0361043	649	1	100	clusters	8	1	0.0332226	541	1	100
closed	6	8	0.0361043	649	1	100	co	2	1	0.0332226	541	1	100
collaboration	13	8	0.0361043	649	1	100	co_management	13	1	0.0332226	541	1	100
collaborative	13	8	0.0361043	649	1	100	collection	10	1	0.0332226	541	1	100
concept	7	8	0.0361043	649	1	100	collects	8	1	0.0332226	541	1	100
concerns	8	8	0.0361043	649	1	100	comanagement	12	1	0.0332226	541	1	100
consideration	13	8	0.0361043	649	1	100	comarine	8	1	0.0332226	541	1	100
contrast	8	8	0.0361043	649	1	100	combine	7	1	0.0332226	541	1	100
defined	7	8	0.0361043	649	1	100	comes	5	1	0.0332226	541	1	100
demersal	8	8	0.0361043	649	1	100	commercial	10	1	0.0332226	541	1	100
east	4	8	0.0361043	649	1	100	communications	14	1	0.0332226	541	1	100
eb	2	8	0.0361043	649	1	100	completely	10	1	0.0332226	541	1	100
ecology	7	8	0.0361043	649	1	100	comply	6	1	0.0332226	541	1	100
environments	12	8	0.0361043	649	1	100	comprises	9	1	0.0332226	541	1	100
european	8	8	0.0361043	649	1	100	computation	11	1	0.0332226	541	1	100
far	3	8	0.0361043	649	1	100	conceição	9	1	0.0332226	541	1	100
food	4	8	0.0361043	649	1	100	concerning	10	1	0.0332226	541	1	100
forward	7	8	0.0361043	649	1	100	concludes	9	1	0.0332226	541	1	100
full	4	8	0.0361043	649	1	100	conditioning	12	1	0.0332226	541	1	100
goal	4	8	0.0361043	649	1	100	conducted	9	1	0.0332226	541	1	100
governments	11	8	0.0361043	649	1	100	confer	6	1	0.0332226	541	1	100
guidelines	10	8	0.0361043	649	1	100	conference	10	1	0.0332226	541	1	100
hawaii	6	8	0.0361043	649	1	100	configure	9	1	0.0332226	541	1	100
higher	6	8	0.0361043	649	1	100	consecrated	11	1	0.0332226	541	1	100
ii	2	8	0.0361043	649	1	100	conservation_units	18	1	0.0332226	541	1	100
incorporation	13	8	0.0361043	649	1	100	conservations	13	1	0.0332226	541	1	100
index	5	8	0.0361043	649	1	100	considerable	12	1	0.0332226	541	1	100
inside	6	8	0.0361043	649	1	100	consists	8	1	0.0332226	541	1	100
jurisdiction	12	8	0.0361043	649	1	100	consolidation	13	1	0.0332226	541	1	100
largely	7	8	0.0361043	649	1	100	constitution	12	1	0.0332226	541	1	100
larger	6	8	0.0361043	649	1	100	constrains	10	1	0.0332226	541	1	100
learned	7	8	0.0361043	649	1	100	content	7	1	0.0332226	541	1	100
linked	6	8	0.0361043	649	1	100	continue	8	1	0.0332226	541	1	100
little	6	8	0.0361043	649	1	100	continuing	10	1	0.0332226	541	1	100
live	4	8	0.0361043	649	1	100	contributed	11	1	0.0332226	541	1	100
logic	5	8	0.0361043	649	1	100	contributions	13	1	0.0332226	541	1	100
loss	4	8	0.0361043	649	1	100	controversial	13	1	0.0332226	541	1	100
makers	6	8	0.0361043	649	1	100	convention	10	1	0.0332226	541	1	100
matrix	6	8	0.0361043	649	1	100	coordination	12	1	0.0332226	541	1	100
means	5	8	0.0361043	649	1	100	cop	3	1	0.0332226	541	1	100
migratory	9	8	0.0361043	649	1	100	coqueiros	9	1	0.0332226	541	1	100
msm	3	8	0.0361043	649	1	100	correspondence	14	1	0.0332226	541	1	100
northern	8	8	0.0361043	649	1	100	corresponding	13	1	0.0332226	541	1	100
overlap	7	8	0.0361043	649	1	100	costa	5	1	0.0332226	541	1	100
parameters	10	8	0.0361043	649	1	100	costa_dos_corais	16	1	0.0332226	541	1	100
philippines	11	8	0.0361043	649	1	100	council	7	1	0.0332226	541	1	100
policies	8	8	0.0361043	649	1	100	countries	9	1	0.0332226	541	1	100
predictive	10	8	0.0361043	649	1	100	country	7	1	0.0332226	541	1	100
produce	7	8	0.0361043	649	1	100	covered	7	1	0.0332226	541	1	100
proportion	10	8	0.0361043	649	1	100	create	6	1	0.0332226	541	1	100
ranges	6	8	0.0361043	649	1	100	creates	7	1	0.0332226	541	1	100
refugia	7	8	0.0361043	649	1	100	creating	8	1	0.0332226	541	1	100
regarding	9	8	0.0361043	649	1	100	crises	6	1	0.0332226	541	1	100
regimes	7	8	0.0361043	649	1	100	crops	5	1	0.0332226	541	1	100
revealed	8	8	0.0361043	649	1	100	cruz	4	1	0.0332226	541	1	100
scp	3	8	0.0361043	649	1	100	culminated	10	1	0.0332226	541	1	100
seven	5	8	0.0361043	649	1	100	cultural	8	1	0.0332226	541	1	100
shallow	7	8	0.0361043	649	1	100	culture	7	1	0.0332226	541	1	100
sharks	6	8	0.0361043	649	1	100	currently	9	1	0.0332226	541	1	100
since	5	8	0.0361043	649	1	100	cycle	5	1	0.0332226	541	1	100
sof	3	8	0.0361043	649	1	100	daily	5	1	0.0332226	541	1	100
solutions	9	8	0.0361043	649	1	100	dataset	7	1	0.0332226	541	1	100
structures	10	8	0.0361043	649	1	100	days	4	1	0.0332226	541	1	100
substantially	13	8	0.0361043	649	1	100	decades	7	1	0.0332226	541	1	100
surface	7	8	0.0361043	649	1	100	decision_making	15	1	0.0332226	541	1	100
turfs	5	8	0.0361043	649	1	100	deepening	9	1	0.0332226	541	1	100
unique	6	8	0.0361043	649	1	100	define	6	1	0.0332226	541	1	100
users	5	8	0.0361043	649	1	100	definition	10	1	0.0332226	541	1	100
varied	6	8	0.0361043	649	1	100	degrees	7	1	0.0332226	541	1	100
vulnerable	10	8	0.0361043	649	1	100	delineate	9	1	0.0332226	541	1	100
warming	7	8	0.0361043	649	1	100	delivery	8	1	0.0332226	541	1	100
whilst	6	8	0.0361043	649	1	100	demographic	11	1	0.0332226	541	1	100
according	9	7	0.0315913	728	1	100	demonstrating	13	1	0.0332226	541	1	100
affected	8	7	0.0315913	728	1	100	describes	9	1	0.0332226	541	1	100
allows	6	7	0.0315913	728	1	100	describing	10	1	0.0332226	541	1	100
ared	4	7	0.0315913	728	1	100	descriptive_exploratory	23	1	0.0332226	541	1	100
array	5	7	0.0315913	728	1	100	designation	11	1	0.0332226	541	1	100
balance	7	7	0.0315913	728	1	100	detailed	8	1	0.0332226	541	1	100
black	5	7	0.0315913	728	1	100	detects	7	1	0.0332226	541	1	100
breeding	8	7	0.0315913	728	1	100	determined	10	1	0.0332226	541	1	100
caribbean	9	7	0.0315913	728	1	100	develop	7	1	0.0332226	541	1	100
closure	7	7	0.0315913	728	1	100	devise	6	1	0.0332226	541	1	100
coexistence	11	7	0.0315913	728	1	100	dialog	6	1	0.0332226	541	1	100
combining	9	7	0.0315913	728	1	100	dialogue	8	1	0.0332226	541	1	100
competing	9	7	0.0315913	728	1	100	did	3	1	0.0332226	541	1	100
components	10	7	0.0315913	728	1	100	diferents	9	1	0.0332226	541	1	100
conclude	8	7	0.0315913	728	1	100	difference	10	1	0.0332226	541	1	100
conducted	9	7	0.0315913	728	1	100	differentiate	13	1	0.0332226	541	1	100
conserve	8	7	0.0315913	728	1	100	differentiation	15	1	0.0332226	541	1	100
convention	10	7	0.0315913	728	1	100	differently	11	1	0.0332226	541	1	100
cooperation	11	7	0.0315913	728	1	100	directions	10	1	0.0332226	541	1	100
coverage	8	7	0.0315913	728	1	100	disconnect	10	1	0.0332226	541	1	100
cross	5	7	0.0315913	728	1	100	discoursed	10	1	0.0332226	541	1	100
deeper	6	7	0.0315913	728	1	100	discusses	9	1	0.0332226	541	1	100
degree	6	7	0.0315913	728	1	100	disparity	9	1	0.0332226	541	1	100
demonstrated	12	7	0.0315913	728	1	100	dissatisfaction	15	1	0.0332226	541	1	100
depends	7	7	0.0315913	728	1	100	distinct	8	1	0.0332226	541	1	100
determine	9	7	0.0315913	728	1	100	distribution	12	1	0.0332226	541	1	100
directly	8	7	0.0315913	728	1	100	disturbance	11	1	0.0332226	541	1	100
drivers	7	7	0.0315913	728	1	100	divergent	9	1	0.0332226	541	1	100
eastern	7	7	0.0315913	728	1	100	diverging	9	1	0.0332226	541	1	100
either	6	7	0.0315913	728	1	100	diversify	9	1	0.0332226	541	1	100
emerging	8	7	0.0315913	728	1	100	diversity	9	1	0.0332226	541	1	100
enhanced	8	7	0.0315913	728	1	100	divided	7	1	0.0332226	541	1	100
evaluated	9	7	0.0315913	728	1	100	dividing	8	1	0.0332226	541	1	100
evaluations	11	7	0.0315913	728	1	100	diving	6	1	0.0332226	541	1	100
examples	8	7	0.0315913	728	1	100	does	4	1	0.0332226	541	1	100
expansions	10	7	0.0315913	728	1	100	domains	7	1	0.0332226	541	1	100
flexible	8	7	0.0315913	728	1	100	done	4	1	0.0332226	541	1	100
forest	6	7	0.0315913	728	1	100	drainage	8	1	0.0332226	541	1	100
fundamental	11	7	0.0315913	728	1	100	dramas	6	1	0.0332226	541	1	100
fuzzy	5	7	0.0315913	728	1	100	duties	6	1	0.0332226	541	1	100
generally	9	7	0.0315913	728	1	100	dynamic	7	1	0.0332226	541	1	100
globally	8	7	0.0315913	728	1	100	dynamics	8	1	0.0332226	541	1	100
good	4	7	0.0315913	728	1	100	earth	5	1	0.0332226	541	1	100
highest	7	7	0.0315913	728	1	100	easiness	8	1	0.0332226	541	1	100
hoc	3	7	0.0315913	728	1	100	ecological_economic	19	1	0.0332226	541	1	100
home	4	7	0.0315913	728	1	100	ecological_economical	21	1	0.0332226	541	1	100
incorporate	11	7	0.0315913	728	1	100	ecologically	12	1	0.0332226	541	1	100
indicates	9	7	0.0315913	728	1	100	economic_financial	18	1	0.0332226	541	1	100
informed	8	7	0.0315913	728	1	100	economical	10	1	0.0332226	541	1	100
interest	8	7	0.0315913	728	1	100	ecosystem	9	1	0.0332226	541	1	100
japan	5	7	0.0315913	728	1	100	education	9	1	0.0332226	541	1	100
kelp	4	7	0.0315913	728	1	100	eia	3	1	0.0332226	541	1	100
like	4	7	0.0315913	728	1	100	either	6	1	0.0332226	541	1	100
locations	9	7	0.0315913	728	1	100	elaborate	9	1	0.0332226	541	1	100
maintaining	11	7	0.0315913	728	1	100	elapse	6	1	0.0332226	541	1	100
manner	6	7	0.0315913	728	1	100	electronic	10	1	0.0332226	541	1	100
minimize	8	7	0.0315913	728	1	100	element	7	1	0.0332226	541	1	100
mobile	6	7	0.0315913	728	1	100	embracing	9	1	0.0332226	541	1	100
moving	6	7	0.0315913	728	1	100	emerging	8	1	0.0332226	541	1	100
nevertheless	12	7	0.0315913	728	1	100	employees	9	1	0.0332226	541	1	100
oceanic	7	7	0.0315913	728	1	100	empowerment	11	1	0.0332226	541	1	100
perceived	9	7	0.0315913	728	1	100	encountered	11	1	0.0332226	541	1	100
perceptions	11	7	0.0315913	728	1	100	end	3	1	0.0332226	541	1	100
perspective	11	7	0.0315913	728	1	100	enhance	7	1	0.0332226	541	1	100
play	4	7	0.0315913	728	1	100	enseada	7	1	0.0332226	541	1	100
practical	9	7	0.0315913	728	1	100	enviromental	12	1	0.0332226	541	1	100
predict	7	7	0.0315913	728	1	100	erosinal	8	1	0.0332226	541	1	100
restrictions	12	7	0.0315913	728	1	100	especially	10	1	0.0332226	541	1	100
security	8	7	0.0315913	728	1	100	establish	9	1	0.0332226	541	1	100
shortcomings	12	7	0.0315913	728	1	100	establishment	13	1	0.0332226	541	1	100
shown	5	7	0.0315913	728	1	100	estado_de_santa_catarina	24	1	0.0332226	541	1	100
smaller	7	7	0.0315913	728	1	100	estimate	8	1	0.0332226	541	1	100
snook	5	7	0.0315913	728	1	100	estuaries	9	1	0.0332226	541	1	100
special	7	7	0.0315913	728	1	100	ethnobiological	15	1	0.0332226	541	1	100
stock	5	7	0.0315913	728	1	100	eups	4	1	0.0332226	541	1	100
stress	6	7	0.0315913	728	1	100	evaluate	8	1	0.0332226	541	1	100
test	4	7	0.0315913	728	1	100	everlasting	11	1	0.0332226	541	1	100
theoretical	11	7	0.0315913	728	1	100	evidenced	9	1	0.0332226	541	1	100
trends	6	7	0.0315913	728	1	100	evidencing	10	1	0.0332226	541	1	100
tuna	4	7	0.0315913	728	1	100	evolution	9	1	0.0332226	541	1	100
undertaken	10	7	0.0315913	728	1	100	evolved	7	1	0.0332226	541	1	100
valuable	8	7	0.0315913	728	1	100	evolves	7	1	0.0332226	541	1	100
varying	7	7	0.0315913	728	1	100	exclusion	9	1	0.0332226	541	1	100
western	7	7	0.0315913	728	1	100	exclusive	9	1	0.0332226	541	1	100
who	3	7	0.0315913	728	1	100	exclusively	11	1	0.0332226	541	1	100
widely	6	7	0.0315913	728	1	100	execution	9	1	0.0332226	541	1	100
work	4	7	0.0315913	728	1	100	exhibition	10	1	0.0332226	541	1	100
actual	6	6	0.0270783	815	1	100	existent	8	1	0.0332226	541	1	100
ad	2	6	0.0270783	815	1	100	exists	6	1	0.0332226	541	1	100
addressed	9	6	0.0270783	815	1	100	exotic	6	1	0.0332226	541	1	100
adequate	8	6	0.0270783	815	1	100	expected	8	1	0.0332226	541	1	100
adjacent	8	6	0.0270783	815	1	100	expecting	9	1	0.0332226	541	1	100
affecting	9	6	0.0270783	815	1	100	experienced	11	1	0.0332226	541	1	100
aimed	5	6	0.0270783	815	1	100	exploitation	12	1	0.0332226	541	1	100
beneficial	10	6	0.0270783	815	1	100	exploring	9	1	0.0332226	541	1	100
bioregions	10	6	0.0270783	815	1	100	extension	9	1	0.0332226	541	1	100
boundary	8	6	0.0270783	815	1	100	external	8	1	0.0332226	541	1	100
choices	7	6	0.0270783	815	1	100	extractive	10	1	0.0332226	541	1	100
combination	11	6	0.0270783	815	1	100	faced	5	1	0.0332226	541	1	100
complement	10	6	0.0270783	815	1	100	fact	4	1	0.0332226	541	1	100
complicated	11	6	0.0270783	815	1	100	facts	5	1	0.0332226	541	1	100
confidence	10	6	0.0270783	815	1	100	failure	7	1	0.0332226	541	1	100
conflicting	11	6	0.0270783	815	1	100	farm	4	1	0.0332226	541	1	100
conserving	10	6	0.0270783	815	1	100	fast	4	1	0.0332226	541	1	100
considerable	12	6	0.0270783	815	1	100	fauna	5	1	0.0332226	541	1	100
continued	9	6	0.0270783	815	1	100	federal_marine	14	1	0.0332226	541	1	100
conventional	12	6	0.0270783	815	1	100	fell	4	1	0.0332226	541	1	100
cover	5	6	0.0270783	815	1	100	final	5	1	0.0332226	541	1	100
crucial	7	6	0.0270783	815	1	100	finds	5	1	0.0332226	541	1	100
dangerous	9	6	0.0270783	815	1	100	finnaly	7	1	0.0332226	541	1	100
date	4	6	0.0270783	815	1	100	fisher	6	1	0.0332226	541	1	100
dependent	9	6	0.0270783	815	1	100	fisherman	9	1	0.0332226	541	1	100
depth	5	6	0.0270783	815	1	100	five	4	1	0.0332226	541	1	100
designations	12	6	0.0270783	815	1	100	focused	7	1	0.0332226	541	1	100
difficult	9	6	0.0270783	815	1	100	followed	8	1	0.0332226	541	1	100
direct	6	6	0.0270783	815	1	100	forcing	7	1	0.0332226	541	1	100
disturbance	11	6	0.0270783	815	1	100	formation	9	1	0.0332226	541	1	100
driven	6	6	0.0270783	815	1	100	formulated	10	1	0.0332226	541	1	100
ecopath	7	6	0.0270783	815	1	100	formulation	11	1	0.0332226	541	1	100
ecosim	6	6	0.0270783	815	1	100	foster	6	1	0.0332226	541	1	100
elements	8	6	0.0270783	815	1	100	found	5	1	0.0332226	541	1	100
encourage	9	6	0.0270783	815	1	100	four	4	1	0.0332226	541	1	100
endangered	10	6	0.0270783	815	1	100	fragilities	11	1	0.0332226	541	1	100
engaging	8	6	0.0270783	815	1	100	fragments	9	1	0.0332226	541	1	100
english	7	6	0.0270783	815	1	100	frequently	10	1	0.0332226	541	1	100
entire	6	6	0.0270783	815	1	100	fulfilling	10	1	0.0332226	541	1	100
epa	3	6	0.0270783	815	1	100	fulfills	8	1	0.0332226	541	1	100
essim	5	6	0.0270783	815	1	100	fully	5	1	0.0332226	541	1	100
establish	9	6	0.0270783	815	1	100	function	8	1	0.0332226	541	1	100
europe	6	6	0.0270783	815	1	100	functioning	11	1	0.0332226	541	1	100
events	6	6	0.0270783	815	1	100	fundamental	11	1	0.0332226	541	1	100
experts	7	6	0.0270783	815	1	100	further	7	1	0.0332226	541	1	100
explicitly	10	6	0.0270783	815	1	100	furthermore	11	1	0.0332226	541	1	100
extinction	10	6	0.0270783	815	1	100	gaps	4	1	0.0332226	541	1	100
extractive	10	6	0.0270783	815	1	100	gas	3	1	0.0332226	541	1	100
face	4	6	0.0270783	815	1	100	gear	4	1	0.0332226	541	1	100
facilitating	12	6	0.0270783	815	1	100	generally	9	1	0.0332226	541	1	100
feasible	8	6	0.0270783	815	1	100	generations	11	1	0.0332226	541	1	100
final	5	6	0.0270783	815	1	100	geographical	12	1	0.0332226	541	1	100
find	4	6	0.0270783	815	1	100	geology	7	1	0.0332226	541	1	100
fleets	6	6	0.0270783	815	1	100	geometric	9	1	0.0332226	541	1	100
focuses	7	6	0.0270783	815	1	100	geomorphology	13	1	0.0332226	541	1	100
fragmented	10	6	0.0270783	815	1	100	georeferenced	13	1	0.0332226	541	1	100
frameworks	10	6	0.0270783	815	1	100	goal	4	1	0.0332226	541	1	100
gap	3	6	0.0270783	815	1	100	gomes	5	1	0.0332226	541	1	100
guidance	8	6	0.0270783	815	1	100	govern	6	1	0.0332226	541	1	100
harvesting	10	6	0.0270783	815	1	100	grid	4	1	0.0332226	541	1	100
highlight	9	6	0.0270783	815	1	100	ground	6	1	0.0332226	541	1	100
histories	9	6	0.0270783	815	1	100	grounds	7	1	0.0332226	541	1	100
incorporated	12	6	0.0270783	815	1	100	group	5	1	0.0332226	541	1	100
incorporates	12	6	0.0270783	815	1	100	grouping	8	1	0.0332226	541	1	100
industrial	10	6	0.0270783	815	1	100	growingly	9	1	0.0332226	541	1	100
initial	7	6	0.0270783	815	1	100	guardianship	12	1	0.0332226	541	1	100
investigated	12	6	0.0270783	815	1	100	habitat	7	1	0.0332226	541	1	100
involvement	11	6	0.0270783	815	1	100	harbor	6	1	0.0332226	541	1	100
island	6	6	0.0270783	815	1	100	harmonize	9	1	0.0332226	541	1	100
lead	4	6	0.0270783	815	1	100	help	4	1	0.0332226	541	1	100
legislation	11	6	0.0270783	815	1	100	helps	5	1	0.0332226	541	1	100
losses	6	6	0.0270783	815	1	100	here	4	1	0.0332226	541	1	100
lower	5	6	0.0270783	815	1	100	high_salt	9	1	0.0332226	541	1	100
madagascar	10	6	0.0270783	815	1	100	highlight	9	1	0.0332226	541	1	100
maintenance	11	6	0.0270783	815	1	100	highway	7	1	0.0332226	541	1	100
malaysia	8	6	0.0270783	815	1	100	hinders	7	1	0.0332226	541	1	100
maritime	8	6	0.0270783	815	1	100	history	7	1	0.0332226	541	1	100
meaningful	10	6	0.0270783	815	1	100	homogeneous	11	1	0.0332226	541	1	100
metapopulation	14	6	0.0270783	815	1	100	hunting	7	1	0.0332226	541	1	100
million	7	6	0.0270783	815	1	100	ichthyoplankton	15	1	0.0332226	541	1	100
mitigate	8	6	0.0270783	815	1	100	icmbio	6	1	0.0332226	541	1	100
mms	3	6	0.0270783	815	1	100	identification	14	1	0.0332226	541	1	100
mortality	9	6	0.0270783	815	1	100	identifying	11	1	0.0332226	541	1	100
mre	3	6	0.0270783	815	1	100	illegal	7	1	0.0332226	541	1	100
nations	7	6	0.0270783	815	1	100	implementing	12	1	0.0332226	541	1	100
novel	5	6	0.0270783	815	1	100	imposed	7	1	0.0332226	541	1	100
off	3	6	0.0270783	815	1	100	improved	8	1	0.0332226	541	1	100
partnerships	12	6	0.0270783	815	1	100	included	8	1	0.0332226	541	1	100
parts	5	6	0.0270783	815	1	100	including	9	1	0.0332226	541	1	100
percentage	10	6	0.0270783	815	1	100	income	6	1	0.0332226	541	1	100
planned	7	6	0.0270783	815	1	100	increased	9	1	0.0332226	541	1	100
poorly	6	6	0.0270783	815	1	100	increasingly	12	1	0.0332226	541	1	100
prior	5	6	0.0270783	815	1	100	indices	7	1	0.0332226	541	1	100
programs	8	6	0.0270783	815	1	100	indirect	8	1	0.0332226	541	1	100
propose	7	6	0.0270783	815	1	100	industry	8	1	0.0332226	541	1	100
ranging	7	6	0.0270783	815	1	100	inefficient	11	1	0.0332226	541	1	100
rarely	6	6	0.0270783	815	1	100	influenced	10	1	0.0332226	541	1	100
rate	4	6	0.0270783	815	1	100	influences	10	1	0.0332226	541	1	100
recommend	9	6	0.0270783	815	1	100	influencing	11	1	0.0332226	541	1	100
recommended	11	6	0.0270783	815	1	100	influential	11	1	0.0332226	541	1	100
recover	7	6	0.0270783	815	1	100	infractions	11	1	0.0332226	541	1	100
recruits	8	6	0.0270783	815	1	100	infrastructure	14	1	0.0332226	541	1	100
red	3	6	0.0270783	815	1	100	initially	9	1	0.0332226	541	1	100
reflected	9	6	0.0270783	815	1	100	inspections	11	1	0.0332226	541	1	100
relationship	12	6	0.0270783	815	1	100	intended	8	1	0.0332226	541	1	100
remaining	9	6	0.0270783	815	1	100	intends	7	1	0.0332226	541	1	100
renewable	9	6	0.0270783	815	1	100	intensifying	12	1	0.0332226	541	1	100
report	6	6	0.0270783	815	1	100	intensively	11	1	0.0332226	541	1	100
represented	11	6	0.0270783	815	1	100	inter_institutional	19	1	0.0332226	541	1	100
reproduction	12	6	0.0270783	815	1	100	interconnected	14	1	0.0332226	541	1	100
reproductive	12	6	0.0270783	815	1	100	interdisciplinary	17	1	0.0332226	541	1	100
respond	7	6	0.0270783	815	1	100	interfere	9	1	0.0332226	541	1	100
resulted	8	6	0.0270783	815	1	100	intermediary	12	1	0.0332226	541	1	100
ross	4	6	0.0270783	815	1	100	internal	8	1	0.0332226	541	1	100
score	5	6	0.0270783	815	1	100	internationally	15	1	0.0332226	541	1	100
scotian	7	6	0.0270783	815	1	100	interpret	9	1	0.0332226	541	1	100
sector	6	6	0.0270783	815	1	100	interpreted	11	1	0.0332226	541	1	100
sectors	7	6	0.0270783	815	1	100	interviewed	11	1	0.0332226	541	1	100
shift	5	6	0.0270783	815	1	100	interviewees	12	1	0.0332226	541	1	100
shifts	6	6	0.0270783	815	1	100	invalidate	10	1	0.0332226	541	1	100
shows	5	6	0.0270783	815	1	100	investigated	12	1	0.0332226	541	1	100
sink	4	6	0.0270783	815	1	100	involvement	11	1	0.0332226	541	1	100
skipjack	8	6	0.0270783	815	1	100	iriko_fish	10	1	0.0332226	541	1	100
son	3	6	0.0270783	815	1	100	irrational	10	1	0.0332226	541	1	100
space	5	6	0.0270783	815	1	100	island	6	1	0.0332226	541	1	100
statewide	9	6	0.0270783	815	1	100	jeopardizing	12	1	0.0332226	541	1	100
strategically	13	6	0.0270783	815	1	100	jurisdiction	12	1	0.0332226	541	1	100
strongly	8	6	0.0270783	815	1	100	jurisdictions	13	1	0.0332226	541	1	100
suggesting	10	6	0.0270783	815	1	100	just	4	1	0.0332226	541	1	100
supported	9	6	0.0270783	815	1	100	justifications	14	1	0.0332226	541	1	100
taken	5	6	0.0270783	815	1	100	keywords	8	1	0.0332226	541	1	100
temperatures	12	6	0.0270783	815	1	100	kind	4	1	0.0332226	541	1	100
ten	3	6	0.0270783	815	1	100	kinds	5	1	0.0332226	541	1	100
tend	4	6	0.0270783	815	1	100	known	5	1	0.0332226	541	1	100
territorial	11	6	0.0270783	815	1	100	lacking	7	1	0.0332226	541	1	100
though	6	6	0.0270783	815	1	100	lacks	5	1	0.0332226	541	1	100
tracking	8	6	0.0270783	815	1	100	laguna	6	1	0.0332226	541	1	100
tradeoffs	9	6	0.0270783	815	1	100	laguna_balneário	16	1	0.0332226	541	1	100
transparency	12	6	0.0270783	815	1	100	laminar	7	1	0.0332226	541	1	100
true	4	6	0.0270783	815	1	100	landings	8	1	0.0332226	541	1	100
typically	9	6	0.0270783	815	1	100	language	8	1	0.0332226	541	1	100
uncertainties	13	6	0.0270783	815	1	100	largest	7	1	0.0332226	541	1	100
units	5	6	0.0270783	815	1	100	layers	6	1	0.0332226	541	1	100
ways	4	6	0.0270783	815	1	100	lead	4	1	0.0332226	541	1	100
without	7	6	0.0270783	815	1	100	leaders	7	1	0.0332226	541	1	100
worldwide	9	6	0.0270783	815	1	100	leading	7	1	0.0332226	541	1	100
zonation	8	6	0.0270783	815	1	100	lek	3	1	0.0332226	541	1	100
abundances	10	5	0.0225652	962	1	100	less	4	1	0.0332226	541	1	100
achievement	11	5	0.0225652	962	1	100	levels	6	1	0.0332226	541	1	100
adjustment	10	5	0.0225652	962	1	100	like	4	1	0.0332226	541	1	100
adopting	8	5	0.0225652	962	1	100	limiting	8	1	0.0332226	541	1	100
advances	8	5	0.0225652	962	1	100	line	4	1	0.0332226	541	1	100
africa	6	5	0.0225652	962	1	100	link	4	1	0.0332226	541	1	100
agency	6	5	0.0225652	962	1	100	litoral_norte_de_são_paulo	26	1	0.0332226	541	1	100
aid	3	5	0.0225652	962	1	100	little	6	1	0.0332226	541	1	100
alone	5	5	0.0225652	962	1	100	live	4	1	0.0332226	541	1	100
along	5	5	0.0225652	962	1	100	lived	5	1	0.0332226	541	1	100
anthropogenic	13	5	0.0225652	962	1	100	living	6	1	0.0332226	541	1	100
applying	8	5	0.0225652	962	1	100	localized	9	1	0.0332226	541	1	100
aquarium	8	5	0.0225652	962	1	100	locations	9	1	0.0332226	541	1	100
artisanal	9	5	0.0225652	962	1	100	long	4	1	0.0332226	541	1	100
assist	6	5	0.0225652	962	1	100	losses	6	1	0.0332226	541	1	100
attributes	10	5	0.0225652	962	1	100	lynch	5	1	0.0332226	541	1	100
availability	12	5	0.0225652	962	1	100	made	4	1	0.0332226	541	1	100
base	4	5	0.0225652	962	1	100	mainly	6	1	0.0332226	541	1	100
before	6	5	0.0225652	962	1	100	mains	5	1	0.0332226	541	1	100
biophysical	11	5	0.0225652	962	1	100	maintaining	11	1	0.0332226	541	1	100
cases	5	5	0.0225652	962	1	100	major	5	1	0.0332226	541	1	100
categorical	11	5	0.0225652	962	1	100	malaise	7	1	0.0332226	541	1	100
category	8	5	0.0225652	962	1	100	manjuba_fish	12	1	0.0332226	541	1	100
certain	7	5	0.0225652	962	1	100	manuscript	10	1	0.0332226	541	1	100
combinations	12	5	0.0225652	962	1	100	many	4	1	0.0332226	541	1	100
combines	8	5	0.0225652	962	1	100	map	3	1	0.0332226	541	1	100
comparison	10	5	0.0225652	962	1	100	mapped	6	1	0.0332226	541	1	100
conceptual	10	5	0.0225652	962	1	100	marginalization	15	1	0.0332226	541	1	100
conclusion	10	5	0.0225652	962	1	100	marinho_costeiras	17	1	0.0332226	541	1	100
condition	9	5	0.0225652	962	1	100	maritime	8	1	0.0332226	541	1	100
consequently	12	5	0.0225652	962	1	100	market	6	1	0.0332226	541	1	100
continue	8	5	0.0225652	962	1	100	matrices	8	1	0.0332226	541	1	100
contributed	11	5	0.0225652	962	1	100	means	5	1	0.0332226	541	1	100
corals	6	5	0.0225652	962	1	100	measure	7	1	0.0332226	541	1	100
covering	8	5	0.0225652	962	1	100	mechanisms	10	1	0.0332226	541	1	100
creating	8	5	0.0225652	962	1	100	mediation	9	1	0.0332226	541	1	100
creation	8	5	0.0225652	962	1	100	meet	4	1	0.0332226	541	1	100
critically	10	5	0.0225652	962	1	100	mentalize	9	1	0.0332226	541	1	100
cycle	5	5	0.0225652	962	1	100	mention	7	1	0.0332226	541	1	100
deal	4	5	0.0225652	962	1	100	mesh	4	1	0.0332226	541	1	100
decades	7	5	0.0225652	962	1	100	methods	7	1	0.0332226	541	1	100
declines	8	5	0.0225652	962	1	100	metrics	7	1	0.0332226	541	1	100
define	6	5	0.0225652	962	1	100	might	5	1	0.0332226	541	1	100
describe	8	5	0.0225652	962	1	100	million	7	1	0.0332226	541	1	100
described	9	5	0.0225652	962	1	100	minimize	8	1	0.0332226	541	1	100
detail	6	5	0.0225652	962	1	100	mitigate	8	1	0.0332226	541	1	100
detailed	8	5	0.0225652	962	1	100	mixed	5	1	0.0332226	541	1	100
developments	12	5	0.0225652	962	1	100	modeling	8	1	0.0332226	541	1	100
directive	9	5	0.0225652	962	1	100	morphological	13	1	0.0332226	541	1	100
dispersal	9	5	0.0225652	962	1	100	mosaic	6	1	0.0332226	541	1	100
distance	8	5	0.0225652	962	1	100	motivation	10	1	0.0332226	541	1	100
dive	4	5	0.0225652	962	1	100	much	4	1	0.0332226	541	1	100
does	4	5	0.0225652	962	1	100	multivariate	12	1	0.0332226	541	1	100
domain	6	5	0.0225652	962	1	100	municipality	12	1	0.0332226	541	1	100
dominant	8	5	0.0225652	962	1	100	municipality_of_santo_antônio_do_pinhal	39	1	0.0332226	541	1	100
done	4	5	0.0225652	962	1	100	narratives	10	1	0.0332226	541	1	100
early	5	5	0.0225652	962	1	100	national_	9	1	0.0332226	541	1	100
england	7	5	0.0225652	962	1	100	national_system_of_marine	25	1	0.0332226	541	1	100
estimate	8	5	0.0225652	962	1	100	nations	7	1	0.0332226	541	1	100
estuarine	9	5	0.0225652	962	1	100	navigation	10	1	0.0332226	541	1	100
evolutionary	12	5	0.0225652	962	1	100	necessarily	11	1	0.0332226	541	1	100
expert	6	5	0.0225652	962	1	100	negative	8	1	0.0332226	541	1	100
explores	8	5	0.0225652	962	1	100	next	4	1	0.0332226	541	1	100
extensive	9	5	0.0225652	962	1	100	no_fishing	10	1	0.0332226	541	1	100
extraction	10	5	0.0225652	962	1	100	no_take_zones	13	1	0.0332226	541	1	100
fiji	4	5	0.0225652	962	1	100	non_acceptable	14	1	0.0332226	541	1	100
foster	6	5	0.0225652	962	1	100	normative	9	1	0.0332226	541	1	100
foundation	10	5	0.0225652	962	1	100	north	5	1	0.0332226	541	1	100
fpa	3	5	0.0225652	962	1	100	northern	8	1	0.0332226	541	1	100
freshwater	10	5	0.0225652	962	1	100	noticed	7	1	0.0332226	541	1	100
geographical	12	5	0.0225652	962	1	100	nowadays	8	1	0.0332226	541	1	100
gully	5	5	0.0225652	962	1	100	number	6	1	0.0332226	541	1	100
half	4	5	0.0225652	962	1	100	object	6	1	0.0332226	541	1	100
highlights	10	5	0.0225652	962	1	100	obtain	6	1	0.0332226	541	1	100
historical	10	5	0.0225652	962	1	100	occurrence	10	1	0.0332226	541	1	100
ideals	6	5	0.0225652	962	1	100	off_shore	9	1	0.0332226	541	1	100
identifies	10	5	0.0225652	962	1	100	often	5	1	0.0332226	541	1	100
inclusion	9	5	0.0225652	962	1	100	oil	3	1	0.0332226	541	1	100
inconsistent	12	5	0.0225652	962	1	100	opens	5	1	0.0332226	541	1	100
input	5	5	0.0225652	962	1	100	operate	7	1	0.0332226	541	1	100
insights	8	5	0.0225652	962	1	100	operation	9	1	0.0332226	541	1	100
institutional	13	5	0.0225652	962	1	100	organization	12	1	0.0332226	541	1	100
intensity	9	5	0.0225652	962	1	100	organizational	14	1	0.0332226	541	1	100
investigate	11	5	0.0225652	962	1	100	organizations	13	1	0.0332226	541	1	100
involved	8	5	0.0225652	962	1	100	organizes	9	1	0.0332226	541	1	100
just	4	5	0.0225652	962	1	100	outside	7	1	0.0332226	541	1	100
known	5	5	0.0225652	962	1	100	overlap	7	1	0.0332226	541	1	100
led	3	5	0.0225652	962	1	100	overlaps	8	1	0.0332226	541	1	100
limits	6	5	0.0225652	962	1	100	overly	6	1	0.0332226	541	1	100
linking	7	5	0.0225652	962	1	100	own	3	1	0.0332226	541	1	100
manage	6	5	0.0225652	962	1	100	pa	2	1	0.0332226	541	1	100
maximize	8	5	0.0225652	962	1	100	paper	5	1	0.0332226	541	1	100
meeting	7	5	0.0225652	962	1	100	participant	11	1	0.0332226	541	1	100
met	3	5	0.0225652	962	1	100	partners	8	1	0.0332226	541	1	100
metapopulations	15	5	0.0225652	962	1	100	partnership	11	1	0.0332226	541	1	100
mining	6	5	0.0225652	962	1	100	past	4	1	0.0332226	541	1	100
mobility	8	5	0.0225652	962	1	100	paths	5	1	0.0332226	541	1	100
monetary	8	5	0.0225652	962	1	100	pedology	8	1	0.0332226	541	1	100
moreover	8	5	0.0225652	962	1	100	people	6	1	0.0332226	541	1	100
movements	9	5	0.0225652	962	1	100	performance	11	1	0.0332226	541	1	100
namely	6	5	0.0225652	962	1	100	performed	9	1	0.0332226	541	1	100
nearly	6	5	0.0225652	962	1	100	performing	10	1	0.0332226	541	1	100
ningaloo	8	5	0.0225652	962	1	100	perspectives	12	1	0.0332226	541	1	100
optimized	9	5	0.0225652	962	1	100	photic	6	1	0.0332226	541	1	100
organisms	9	5	0.0225652	962	1	100	photographs	11	1	0.0332226	541	1	100
overfishing	11	5	0.0225652	962	1	100	pinhal_sp	9	1	0.0332226	541	1	100
participative	13	5	0.0225652	962	1	100	pipeline	8	1	0.0332226	541	1	100
participatory	13	5	0.0225652	962	1	100	pirajubaé	9	1	0.0332226	541	1	100
people	6	5	0.0225652	962	1	100	planktonic	10	1	0.0332226	541	1	100
perspectives	12	5	0.0225652	962	1	100	planned	7	1	0.0332226	541	1	100
phases	6	5	0.0225652	962	1	100	play	4	1	0.0332226	541	1	100
plaice	6	5	0.0225652	962	1	100	played	6	1	0.0332226	541	1	100
pmhs	4	5	0.0225652	962	1	100	pnma	4	1	0.0332226	541	1	100
posed	5	5	0.0225652	962	1	100	pointing	8	1	0.0332226	541	1	100
ppas	4	5	0.0225652	962	1	100	ponders	7	1	0.0332226	541	1	100
pre	3	5	0.0225652	962	1	100	porto	5	1	0.0332226	541	1	100
presents	8	5	0.0225652	962	1	100	position	8	1	0.0332226	541	1	100
previous	8	5	0.0225652	962	1	100	positively	10	1	0.0332226	541	1	100
primary	7	5	0.0225652	962	1	100	possibilities	13	1	0.0332226	541	1	100
principle	9	5	0.0225652	962	1	100	potentialities	14	1	0.0332226	541	1	100
private	7	5	0.0225652	962	1	100	potentials	10	1	0.0332226	541	1	100
probability	11	5	0.0225652	962	1	100	powerful	8	1	0.0332226	541	1	100
project	7	5	0.0225652	962	1	100	practicing	10	1	0.0332226	541	1	100
projects	8	5	0.0225652	962	1	100	predominant	11	1	0.0332226	541	1	100
protogynous	11	5	0.0225652	962	1	100	presenting	10	1	0.0332226	541	1	100
published	9	5	0.0225652	962	1	100	presently	9	1	0.0332226	541	1	100
quality	7	5	0.0225652	962	1	100	pressure	8	1	0.0332226	541	1	100
rates	5	5	0.0225652	962	1	100	primarily	9	1	0.0332226	541	1	100
re	2	5	0.0225652	962	1	100	prior	5	1	0.0332226	541	1	100
recognised	10	5	0.0225652	962	1	100	priorities	10	1	0.0332226	541	1	100
recruitment	11	5	0.0225652	962	1	100	prioritization	14	1	0.0332226	541	1	100
reflect	7	5	0.0225652	962	1	100	processing	10	1	0.0332226	541	1	100
regulatory	10	5	0.0225652	962	1	100	prodetur	8	1	0.0332226	541	1	100
relation	8	5	0.0225652	962	1	100	produce	7	1	0.0332226	541	1	100
relationships	13	5	0.0225652	962	1	100	productions	11	1	0.0332226	541	1	100
relevance	9	5	0.0225652	962	1	100	professional	12	1	0.0332226	541	1	100
reliable	8	5	0.0225652	962	1	100	progressive	11	1	0.0332226	541	1	100
reviews	7	5	0.0225652	962	1	100	prohibiting	11	1	0.0332226	541	1	100
scope	5	5	0.0225652	962	1	100	promising	9	1	0.0332226	541	1	100
seen	4	5	0.0225652	962	1	100	proportional	12	1	0.0332226	541	1	100
sensitivity	11	5	0.0225652	962	1	100	proposals	9	1	0.0332226	541	1	100
separate	8	5	0.0225652	962	1	100	protected	9	1	0.0332226	541	1	100
serious	7	5	0.0225652	962	1	100	protected_areais	16	1	0.0332226	541	1	100
short	5	5	0.0225652	962	1	100	protected_arearable	19	1	0.0332226	541	1	100
situation	9	5	0.0225652	962	1	100	protected_arearisons	20	1	0.0332226	541	1	100
slope	5	5	0.0225652	962	1	100	protecting	10	1	0.0332226	541	1	100
smp	3	5	0.0225652	962	1	100	protection_area	15	1	0.0332226	541	1	100
spacing	7	5	0.0225652	962	1	100	proved	6	1	0.0332226	541	1	100
spain	5	5	0.0225652	962	1	100	provide	7	1	0.0332226	541	1	100
spr	3	5	0.0225652	962	1	100	provided	8	1	0.0332226	541	1	100
ssrs	4	5	0.0225652	962	1	100	provides	8	1	0.0332226	541	1	100
sst	3	5	0.0225652	962	1	100	providing	9	1	0.0332226	541	1	100
stable	6	5	0.0225652	962	1	100	purpose	7	1	0.0332226	541	1	100
static	6	5	0.0225652	962	1	100	pursue	6	1	0.0332226	541	1	100
structural	10	5	0.0225652	962	1	100	putting	7	1	0.0332226	541	1	100
suggested	9	5	0.0225652	962	1	100	quantifies	10	1	0.0332226	541	1	100
suites	6	5	0.0225652	962	1	100	quantitative	12	1	0.0332226	541	1	100
summary	7	5	0.0225652	962	1	100	quantity	8	1	0.0332226	541	1	100
testing	7	5	0.0225652	962	1	100	quarrels	8	1	0.0332226	541	1	100
thailand	8	5	0.0225652	962	1	100	question	8	1	0.0332226	541	1	100
traditional	11	5	0.0225652	962	1	100	questionnaires	14	1	0.0332226	541	1	100
trawl	5	5	0.0225652	962	1	100	quizzes	7	1	0.0332226	541	1	100
tropical	8	5	0.0225652	962	1	100	rank	4	1	0.0332226	541	1	100
un	2	5	0.0225652	962	1	100	rappam	6	1	0.0332226	541	1	100
underlying	10	5	0.0225652	962	1	100	rather	6	1	0.0332226	541	1	100
unrestricted	12	5	0.0225652	962	1	100	realistic	9	1	0.0332226	541	1	100
variable	8	5	0.0225652	962	1	100	reality	7	1	0.0332226	541	1	100
view	4	5	0.0225652	962	1	100	reasons	7	1	0.0332226	541	1	100
widespread	10	5	0.0225652	962	1	100	recognizable	12	1	0.0332226	541	1	100
windfarm	8	5	0.0225652	962	1	100	reconcile	9	1	0.0332226	541	1	100
yield	5	5	0.0225652	962	1	100	recorded	8	1	0.0332226	541	1	100
able	4	4	0.0180522	1133	1	100	records	7	1	0.0332226	541	1	100
above	5	4	0.0180522	1133	1	100	red	3	1	0.0332226	541	1	100
absence	7	4	0.0180522	1133	1	100	reduced	7	1	0.0332226	541	1	100
academics	9	4	0.0180522	1133	1	100	reduction	9	1	0.0332226	541	1	100
accurate	8	4	0.0180522	1133	1	100	reference	9	1	0.0332226	541	1	100
adapting	8	4	0.0180522	1133	1	100	reforms	7	1	0.0332226	541	1	100
additive	8	4	0.0180522	1133	1	100	refugia	7	1	0.0332226	541	1	100
agreement	9	4	0.0180522	1133	1	100	refuting	8	1	0.0332226	541	1	100
ahead	5	4	0.0180522	1133	1	100	regardless	10	1	0.0332226	541	1	100
aims	4	4	0.0180522	1133	1	100	regime	6	1	0.0332226	541	1	100
aligned	7	4	0.0180522	1133	1	100	regional	8	1	0.0332226	541	1	100
almost	6	4	0.0180522	1133	1	100	regular	7	1	0.0332226	541	1	100
another	7	4	0.0180522	1133	1	100	regulate	8	1	0.0332226	541	1	100
antarctic	9	4	0.0180522	1133	1	100	reinforce	9	1	0.0332226	541	1	100
applications	12	4	0.0180522	1133	1	100	relates	7	1	0.0332226	541	1	100
assemblages	11	4	0.0180522	1133	1	100	relations	9	1	0.0332226	541	1	100
assesses	8	4	0.0180522	1133	1	100	relatively	10	1	0.0332226	541	1	100
assumed	7	4	0.0180522	1133	1	100	remarkable	10	1	0.0332226	541	1	100
avoid	5	4	0.0180522	1133	1	100	representative	14	1	0.0332226	541	1	100
awareness	9	4	0.0180522	1133	1	100	represents	10	1	0.0332226	541	1	100
broadly	7	4	0.0180522	1133	1	100	researched	10	1	0.0332226	541	1	100
business	8	4	0.0180522	1133	1	100	researchers	11	1	0.0332226	541	1	100
businesses	10	4	0.0180522	1133	1	100	researches	10	1	0.0332226	541	1	100
cannot	6	4	0.0180522	1133	1	100	reserve	7	1	0.0332226	541	1	100
capable	7	4	0.0180522	1133	1	100	reserves	8	1	0.0332226	541	1	100
carried	7	4	0.0180522	1133	1	100	resident_enterprise	19	1	0.0332226	541	1	100
catches	7	4	0.0180522	1133	1	100	resistance	10	1	0.0332226	541	1	100
categories	10	4	0.0180522	1133	1	100	respect	7	1	0.0332226	541	1	100
caught	6	4	0.0180522	1133	1	100	respectively	12	1	0.0332226	541	1	100
challenging	11	4	0.0180522	1133	1	100	respond	7	1	0.0332226	541	1	100
changed	7	4	0.0180522	1133	1	100	response	8	1	0.0332226	541	1	100
channel	7	4	0.0180522	1133	1	100	restrict	8	1	0.0332226	541	1	100
characterized	13	4	0.0180522	1133	1	100	result	6	1	0.0332226	541	1	100
classified	10	4	0.0180522	1133	1	100	resulting	9	1	0.0332226	541	1	100
coexist	7	4	0.0180522	1133	1	100	revealed	8	1	0.0332226	541	1	100
commitments	11	4	0.0180522	1133	1	100	reveling	8	1	0.0332226	541	1	100
commonwealth	12	4	0.0180522	1133	1	100	reviews	7	1	0.0332226	541	1	100
communication	13	4	0.0180522	1133	1	100	revised	7	1	0.0332226	541	1	100
consensus	9	4	0.0180522	1133	1	100	rights	6	1	0.0332226	541	1	100
consistently	12	4	0.0180522	1133	1	100	ring	4	1	0.0332226	541	1	100
contrasting	11	4	0.0180522	1133	1	100	rio	3	1	0.0332226	541	1	100
coordinated	11	4	0.0180522	1133	1	100	risks	5	1	0.0332226	541	1	100
core	4	4	0.0180522	1133	1	100	robust	6	1	0.0332226	541	1	100
coupled	7	4	0.0180522	1133	1	100	route	5	1	0.0332226	541	1	100
cultural	8	4	0.0180522	1133	1	100	routes	6	1	0.0332226	541	1	100
defining	8	4	0.0180522	1133	1	100	safety	6	1	0.0332226	541	1	100
degradation	11	4	0.0180522	1133	1	100	salvador	8	1	0.0332226	541	1	100
delivery	8	4	0.0180522	1133	1	100	same	4	1	0.0332226	541	1	100
demands	7	4	0.0180522	1133	1	100	santa_cruz_da_conceição_sp	26	1	0.0332226	541	1	100
demonstration	13	4	0.0180522	1133	1	100	santo	5	1	0.0332226	541	1	100
determined	10	4	0.0180522	1133	1	100	santos	6	1	0.0332226	541	1	100
develop	7	4	0.0180522	1133	1	100	são_francisco_mg	16	1	0.0332226	541	1	100
discusses	9	4	0.0180522	1133	1	100	satisfactorily	14	1	0.0332226	541	1	100
displaced	9	4	0.0180522	1133	1	100	sauípe	6	1	0.0332226	541	1	100
distinct	8	4	0.0180522	1133	1	100	scales	6	1	0.0332226	541	1	100
dominated	9	4	0.0180522	1133	1	100	sceneries	9	1	0.0332226	541	1	100
drive	5	4	0.0180522	1133	1	100	scrutinizes	11	1	0.0332226	541	1	100
ecospace	8	4	0.0180522	1133	1	100	sea_surface_temperature	23	1	0.0332226	541	1	100
eezs	4	4	0.0180522	1133	1	100	sea_turtles	11	1	0.0332226	541	1	100
efficient	9	4	0.0180522	1133	1	100	secondary	9	1	0.0332226	541	1	100
eight	5	4	0.0180522	1133	1	100	secondly	8	1	0.0332226	541	1	100
element	7	4	0.0180522	1133	1	100	select	6	1	0.0332226	541	1	100
emperor	7	4	0.0180522	1133	1	100	selected	8	1	0.0332226	541	1	100
empirically	11	4	0.0180522	1133	1	100	selection	9	1	0.0332226	541	1	100
enabled	7	4	0.0180522	1133	1	100	selective	9	1	0.0332226	541	1	100
enables	7	4	0.0180522	1133	1	100	self_organized	14	1	0.0332226	541	1	100
enabling	8	4	0.0180522	1133	1	100	semi_structured	15	1	0.0332226	541	1	100
enco	4	4	0.0180522	1133	1	100	sensor	6	1	0.0332226	541	1	100
engage	6	4	0.0180522	1133	1	100	sequence	8	1	0.0332226	541	1	100
enhancement	11	4	0.0180522	1133	1	100	set	3	1	0.0332226	541	1	100
entropy	7	4	0.0180522	1133	1	100	seventy	7	1	0.0332226	541	1	100
epas	4	4	0.0180522	1133	1	100	shallow	7	1	0.0332226	541	1	100
estimated	9	4	0.0180522	1133	1	100	shapes	6	1	0.0332226	541	1	100
estimation	10	4	0.0180522	1133	1	100	sharing	7	1	0.0332226	541	1	100
estuaries	9	4	0.0180522	1133	1	100	short_term	10	1	0.0332226	541	1	100
eu	2	4	0.0180522	1133	1	100	shortages	9	1	0.0332226	541	1	100
evolving	8	4	0.0180522	1133	1	100	shows	5	1	0.0332226	541	1	100
excellent	9	4	0.0180522	1133	1	100	significant	11	1	0.0332226	541	1	100
exercises	9	4	0.0180522	1133	1	100	similarities	12	1	0.0332226	541	1	100
expansion	9	4	0.0180522	1133	1	100	simple	6	1	0.0332226	541	1	100
expedience	10	4	0.0180522	1133	1	100	simulating	10	1	0.0332226	541	1	100
experiences	11	4	0.0180522	1133	1	100	simulations	11	1	0.0332226	541	1	100
exploration	11	4	0.0180522	1133	1	100	since	5	1	0.0332226	541	1	100
feature	7	4	0.0180522	1133	1	100	site	4	1	0.0332226	541	1	100
fine	4	4	0.0180522	1133	1	100	sites	5	1	0.0332226	541	1	100
fleet	5	4	0.0180522	1133	1	100	situations	10	1	0.0332226	541	1	100
flow	4	4	0.0180522	1133	1	100	slope	5	1	0.0332226	541	1	100
followed	8	4	0.0180522	1133	1	100	small	5	1	0.0332226	541	1	100
forcing	7	4	0.0180522	1133	1	100	snuc	4	1	0.0332226	541	1	100
form	4	4	0.0180522	1133	1	100	so	2	1	0.0332226	541	1	100
frequent	8	4	0.0180522	1133	1	100	social_economical	17	1	0.0332226	541	1	100
gbr	3	4	0.0180522	1133	1	100	socially	8	1	0.0332226	541	1	100
gbrmp	5	4	0.0180522	1133	1	100	socio_ecological	16	1	0.0332226	541	1	100
greatest	8	4	0.0180522	1133	1	100	sociocultural	13	1	0.0332226	541	1	100
guide	5	4	0.0180522	1133	1	100	software	8	1	0.0332226	541	1	100
heterogeneity	13	4	0.0180522	1133	1	100	source	6	1	0.0332226	541	1	100
history	7	4	0.0180522	1133	1	100	south_to_north	14	1	0.0332226	541	1	100
illegal	7	4	0.0180522	1133	1	100	southern_brazil	15	1	0.0332226	541	1	100
illustrate	10	4	0.0180522	1133	1	100	southwestern	12	1	0.0332226	541	1	100
inadequate	10	4	0.0180522	1133	1	100	special	7	1	0.0332226	541	1	100
includes	8	4	0.0180522	1133	1	100	speed	5	1	0.0332226	541	1	100
indian	6	4	0.0180522	1133	1	100	stage	5	1	0.0332226	541	1	100
indices	7	4	0.0180522	1133	1	100	state_park_of_ilha_do_cardoso_sp	32	1	0.0332226	541	1	100
individuals	11	4	0.0180522	1133	1	100	statement	9	1	0.0332226	541	1	100
indonesia	9	4	0.0180522	1133	1	100	statistical	11	1	0.0332226	541	1	100
inshore	7	4	0.0180522	1133	1	100	stemming	8	1	0.0332226	541	1	100
interpretation	14	4	0.0180522	1133	1	100	stock	5	1	0.0332226	541	1	100
interventions	13	4	0.0180522	1133	1	100	stocks	6	1	0.0332226	541	1	100
investment	10	4	0.0180522	1133	1	100	strategically	13	1	0.0332226	541	1	100
involving	9	4	0.0180522	1133	1	100	strengthening	13	1	0.0332226	541	1	100
isolation	9	4	0.0180522	1133	1	100	strengthness	12	1	0.0332226	541	1	100
issue	5	4	0.0180522	1133	1	100	structured	10	1	0.0332226	541	1	100
jurisdictions	13	4	0.0180522	1133	1	100	structures	10	1	0.0332226	541	1	100
krill	5	4	0.0180522	1133	1	100	subsequently	12	1	0.0332226	541	1	100
larvae	6	4	0.0180522	1133	1	100	substitute	10	1	0.0332226	541	1	100
ligurian	8	4	0.0180522	1133	1	100	sufficient	10	1	0.0332226	541	1	100
located	7	4	0.0180522	1133	1	100	suggest	7	1	0.0332226	541	1	100
magnitude	9	4	0.0180522	1133	1	100	suggested	9	1	0.0332226	541	1	100
maintain	8	4	0.0180522	1133	1	100	suggestions	11	1	0.0332226	541	1	100
marginal	8	4	0.0180522	1133	1	100	sul	3	1	0.0332226	541	1	100
mating	6	4	0.0180522	1133	1	100	superimposed	12	1	0.0332226	541	1	100
maxent	6	4	0.0180522	1133	1	100	surrogates	10	1	0.0332226	541	1	100
mcz	3	4	0.0180522	1133	1	100	surrounding	11	1	0.0332226	541	1	100
mczs	4	4	0.0180522	1133	1	100	surroundings	12	1	0.0332226	541	1	100
mean	4	4	0.0180522	1133	1	100	survey	6	1	0.0332226	541	1	100
measure	7	4	0.0180522	1133	1	100	survive	7	1	0.0332226	541	1	100
mechanisms	10	4	0.0180522	1133	1	100	system_of_natural_conservation_units	36	1	0.0332226	541	1	100
methodological	14	4	0.0180522	1133	1	100	taken	5	1	0.0332226	541	1	100
methodology	11	4	0.0180522	1133	1	100	takes	5	1	0.0332226	541	1	100
modeling	8	4	0.0180522	1133	1	100	taking	6	1	0.0332226	541	1	100
move	4	4	0.0180522	1133	1	100	targeted	8	1	0.0332226	541	1	100
msfd	4	4	0.0180522	1133	1	100	technique	9	1	0.0332226	541	1	100
natura	6	4	0.0180522	1133	1	100	temporally_explicit	19	1	0.0332226	541	1	100
ne	2	4	0.0180522	1133	1	100	temporally_varying	18	1	0.0332226	541	1	100
necessarily	11	4	0.0180522	1133	1	100	tendency	8	1	0.0332226	541	1	100
nine	4	4	0.0180522	1133	1	100	terrain	7	1	0.0332226	541	1	100
nova	4	4	0.0180522	1133	1	100	terrestrial	11	1	0.0332226	541	1	100
occurring	9	4	0.0180522	1133	1	100	territories	11	1	0.0332226	541	1	100
oceanographic	13	4	0.0180522	1133	1	100	tested	6	1	0.0332226	541	1	100
once	4	4	0.0180522	1133	1	100	theirs	6	1	0.0332226	541	1	100
optimization	12	4	0.0180522	1133	1	100	themselves	10	1	0.0332226	541	1	100
oriented	8	4	0.0180522	1133	1	100	then	4	1	0.0332226	541	1	100
others	6	4	0.0180522	1133	1	100	theoretical	11	1	0.0332226	541	1	100
outlined	8	4	0.0180522	1133	1	100	thesis	6	1	0.0332226	541	1	100
outputs	7	4	0.0180522	1133	1	100	thorough	8	1	0.0332226	541	1	100
overcome	8	4	0.0180522	1133	1	100	though	6	1	0.0332226	541	1	100
own	3	4	0.0180522	1133	1	100	tidal	5	1	0.0332226	541	1	100
papers	6	4	0.0180522	1133	1	100	time_series	11	1	0.0332226	541	1	100
partial	7	4	0.0180522	1133	1	100	titles	6	1	0.0332226	541	1	100
partially	9	4	0.0180522	1133	1	100	today	5	1	0.0332226	541	1	100
performed	9	4	0.0180522	1133	1	100	todos	5	1	0.0332226	541	1	100
period	6	4	0.0180522	1133	1	100	together	8	1	0.0332226	541	1	100
permitted	9	4	0.0180522	1133	1	100	topography	10	1	0.0332226	541	1	100
piecemeal	9	4	0.0180522	1133	1	100	tourist	7	1	0.0332226	541	1	100
places	6	4	0.0180522	1133	1	100	towards	7	1	0.0332226	541	1	100
planners	8	4	0.0180522	1133	1	100	traditional	11	1	0.0332226	541	1	100
points	6	4	0.0180522	1133	1	100	training	8	1	0.0332226	541	1	100
pressures	9	4	0.0180522	1133	1	100	transmitted	11	1	0.0332226	541	1	100
prevent	7	4	0.0180522	1133	1	100	trinomial	9	1	0.0332226	541	1	100
primarily	9	4	0.0180522	1133	1	100	trips	5	1	0.0332226	541	1	100
problem	7	4	0.0180522	1133	1	100	trust	5	1	0.0332226	541	1	100
problems	8	4	0.0180522	1133	1	100	turned	6	1	0.0332226	541	1	100
produced	8	4	0.0180522	1133	1	100	turning	7	1	0.0332226	541	1	100
promote	7	4	0.0180522	1133	1	100	twentieth	9	1	0.0332226	541	1	100
proposal	8	4	0.0180522	1133	1	100	type	4	1	0.0332226	541	1	100
providing	9	4	0.0180522	1133	1	100	understandings	14	1	0.0332226	541	1	100
ratio	5	4	0.0180522	1133	1	100	unfitness	9	1	0.0332226	541	1	100
real	4	4	0.0180522	1133	1	100	united	6	1	0.0332226	541	1	100
reduction	9	4	0.0180522	1133	1	100	unprotected	11	1	0.0332226	541	1	100
reference	9	4	0.0180522	1133	1	100	urban_zone	10	1	0.0332226	541	1	100
refinement	10	4	0.0180522	1133	1	100	us	2	1	0.0332226	541	1	100
remains	7	4	0.0180522	1133	1	100	usable	6	1	0.0332226	541	1	100
reported	8	4	0.0180522	1133	1	100	users	5	1	0.0332226	541	1	100
represents	10	4	0.0180522	1133	1	100	usle	4	1	0.0332226	541	1	100
resident	8	4	0.0180522	1133	1	100	utility	7	1	0.0332226	541	1	100
resistance	10	4	0.0180522	1133	1	100	validity	8	1	0.0332226	541	1	100
respectively	12	4	0.0180522	1133	1	100	value	5	1	0.0332226	541	1	100
respondents	11	4	0.0180522	1133	1	100	variables	9	1	0.0332226	541	1	100
restrict	8	4	0.0180522	1133	1	100	variations	10	1	0.0332226	541	1	100
richness	8	4	0.0180522	1133	1	100	variety	7	1	0.0332226	541	1	100
right	5	4	0.0180522	1133	1	100	various	7	1	0.0332226	541	1	100
ring	4	4	0.0180522	1133	1	100	vegetation	10	1	0.0332226	541	1	100
robust	6	4	0.0180522	1133	1	100	vessel’s	8	1	0.0332226	541	1	100
sabah	5	4	0.0180522	1133	1	100	viewpoint	9	1	0.0332226	541	1	100
sac	3	4	0.0180522	1133	1	100	villages	8	1	0.0332226	541	1	100
scaling	7	4	0.0180522	1133	1	100	visitation	10	1	0.0332226	541	1	100
scheme	6	4	0.0180522	1133	1	100	visualization	13	1	0.0332226	541	1	100
scores	6	4	0.0180522	1133	1	100	waters	6	1	0.0332226	541	1	100
scotia	6	4	0.0180522	1133	1	100	watershed	9	1	0.0332226	541	1	100
second	6	4	0.0180522	1133	1	100	ways	4	1	0.0332226	541	1	100
selected	8	4	0.0180522	1133	1	100	weak	4	1	0.0332226	541	1	100
service	7	4	0.0180522	1133	1	100	weakness	8	1	0.0332226	541	1	100
sets	4	4	0.0180522	1133	1	100	when	4	1	0.0332226	541	1	100
shared	6	4	0.0180522	1133	1	100	whereas	7	1	0.0332226	541	1	100
shore	5	4	0.0180522	1133	1	100	whilst	6	1	0.0332226	541	1	100
side	4	4	0.0180522	1133	1	100	who	3	1	0.0332226	541	1	100
simplified	10	4	0.0180522	1133	1	100	whole	5	1	0.0332226	541	1	100
situated	8	4	0.0180522	1133	1	100	whose	5	1	0.0332226	541	1	100
sound	5	4	0.0180522	1133	1	100	wich	4	1	0.0332226	541	1	100
sources	7	4	0.0180522	1133	1	100	without	7	1	0.0332226	541	1	100
spangled	8	4	0.0180522	1133	1	100	worked	6	1	0.0332226	541	1	100
spatiotemporal	14	4	0.0180522	1133	1	100	yes	3	1	0.0332226	541	1	100
spawning	8	4	0.0180522	1133	1	100	yield	5	1	0.0332226	541	1	100
staff	5	4	0.0180522	1133	1	100	zone_of_major_relative_environmental_fragility	46	1	0.0332226	541	1	100
stages	6	4	0.0180522	1133	1	100	zone_of_major_relative_environmental_stability	46	1	0.0332226	541	1	100
straightforward	15	4	0.0180522	1133	1	100	zone_of_medium_relative_environmental_fragility	47	1	0.0332226	541	1	100
strengths	9	4	0.0180522	1133	1	100
sub	3	4	0.0180522	1133	1	100
substantial	11	4	0.0180522	1133	1	100
supporting	10	4	0.0180522	1133	1	100
supports	8	4	0.0180522	1133	1	100
surveys	7	4	0.0180522	1133	1	100
task	4	4	0.0180522	1133	1	100
techniques	10	4	0.0180522	1133	1	100
technological	13	4	0.0180522	1133	1	100
technology	10	4	0.0180522	1133	1	100
tested	6	4	0.0180522	1133	1	100
third	5	4	0.0180522	1133	1	100
threat	6	4	0.0180522	1133	1	100
times	5	4	0.0180522	1133	1	100
transparent	11	4	0.0180522	1133	1	100
trawling	8	4	0.0180522	1133	1	100
trend	5	4	0.0180522	1133	1	100
turn	4	4	0.0180522	1133	1	100
underpinning	12	4	0.0180522	1133	1	100
understood	10	4	0.0180522	1133	1	100
unit	4	4	0.0180522	1133	1	100
united	6	4	0.0180522	1133	1	100
unknown	7	4	0.0180522	1133	1	100
unlikely	8	4	0.0180522	1133	1	100
unprecedented	13	4	0.0180522	1133	1	100
variation	9	4	0.0180522	1133	1	100
vi	2	4	0.0180522	1133	1	100
viewed	6	4	0.0180522	1133	1	100
web	3	4	0.0180522	1133	1	100
yields	6	4	0.0180522	1133	1	100
1980s	5	3	0.0135391	1369	1	100
abundant	8	3	0.0135391	1369	1	100
abyssal	7	3	0.0135391	1369	1	100
academic	8	3	0.0135391	1369	1	100
acceptable	10	3	0.0135391	1369	1	100
acoustics	9	3	0.0135391	1369	1	100
actively	8	3	0.0135391	1369	1	100
adapted	7	3	0.0135391	1369	1	100
additionally	12	3	0.0135391	1369	1	100
advisory	8	3	0.0135391	1369	1	100
african	7	3	0.0135391	1369	1	100
agreements	10	3	0.0135391	1369	1	100
alleviate	9	3	0.0135391	1369	1	100
analyse	7	3	0.0135391	1369	1	100
analyzed	8	3	0.0135391	1369	1	100
anticipated	11	3	0.0135391	1369	1	100
applicable	10	3	0.0135391	1369	1	100
approximately	13	3	0.0135391	1369	1	100
aquatic	7	3	0.0135391	1369	1	100
araujo	6	3	0.0135391	1369	1	100
argue	5	3	0.0135391	1369	1	100
assembled	9	3	0.0135391	1369	1	100
assuming	8	3	0.0135391	1369	1	100
attempts	8	3	0.0135391	1369	1	100
attention	9	3	0.0135391	1369	1	100
attitudes	9	3	0.0135391	1369	1	100
australian	10	3	0.0135391	1369	1	100
authority	9	3	0.0135391	1369	1	100
authors	7	3	0.0135391	1369	1	100
avenues	7	3	0.0135391	1369	1	100
avoiding	8	3	0.0135391	1369	1	100
away	4	3	0.0135391	1369	1	100
azores	6	3	0.0135391	1369	1	100
balanced	8	3	0.0135391	1369	1	100
basic	5	3	0.0135391	1369	1	100
becomes	7	3	0.0135391	1369	1	100
becoming	8	3	0.0135391	1369	1	100
begin	5	3	0.0135391	1369	1	100
beginning	9	3	0.0135391	1369	1	100
behaviour	9	3	0.0135391	1369	1	100
benchmark	9	3	0.0135391	1369	1	100
biodiverse	10	3	0.0135391	1369	1	100
bioeconomic	11	3	0.0135391	1369	1	100
biologically	12	3	0.0135391	1369	1	100
bird	4	3	0.0135391	1369	1	100
bleaching	9	3	0.0135391	1369	1	100
boat	4	3	0.0135391	1369	1	100
brings	6	3	0.0135391	1369	1	100
british	7	3	0.0135391	1369	1	100
brt	3	3	0.0135391	1369	1	100
built	5	3	0.0135391	1369	1	100
ca	2	3	0.0135391	1369	1	100
called	6	3	0.0135391	1369	1	100
canary	6	3	0.0135391	1369	1	100
candidate	9	3	0.0135391	1369	1	100
capture	7	3	0.0135391	1369	1	100
carnivorous	11	3	0.0135391	1369	1	100
cause	5	3	0.0135391	1369	1	100
ccz	3	3	0.0135391	1369	1	100
chapter	7	3	0.0135391	1369	1	100
charismatic	11	3	0.0135391	1369	1	100
choosing	8	3	0.0135391	1369	1	100
chosen	6	3	0.0135391	1369	1	100
chronic	7	3	0.0135391	1369	1	100
claims	6	3	0.0135391	1369	1	100
classification	14	3	0.0135391	1369	1	100
clearly	7	3	0.0135391	1369	1	100
coherent	8	3	0.0135391	1369	1	100
columbia	8	3	0.0135391	1369	1	100
commercially	12	3	0.0135391	1369	1	100
commission	10	3	0.0135391	1369	1	100
comparisons	11	3	0.0135391	1369	1	100
compensate	10	3	0.0135391	1369	1	100
competition	11	3	0.0135391	1369	1	100
complementary	13	3	0.0135391	1369	1	100
complete	8	3	0.0135391	1369	1	100
complexities	12	3	0.0135391	1369	1	100
concentrated	12	3	0.0135391	1369	1	100
concluded	9	3	0.0135391	1369	1	100
confer	6	3	0.0135391	1369	1	100
connected	9	3	0.0135391	1369	1	100
considers	9	3	0.0135391	1369	1	100
constructive	12	3	0.0135391	1369	1	100
consultation	12	3	0.0135391	1369	1	100
contains	8	3	0.0135391	1369	1	100
contexts	8	3	0.0135391	1369	1	100
continues	9	3	0.0135391	1369	1	100
control	7	3	0.0135391	1369	1	100
coordinate	10	3	0.0135391	1369	1	100
coordination	12	3	0.0135391	1369	1	100
correlated	10	3	0.0135391	1369	1	100
counteract	10	3	0.0135391	1369	1	100
covered	7	3	0.0135391	1369	1	100
create	6	3	0.0135391	1369	1	100
dangers	7	3	0.0135391	1369	1	100
darwin	6	3	0.0135391	1369	1	100
decade	6	3	0.0135391	1369	1	100
declaration	11	3	0.0135391	1369	1	100
decrease	8	3	0.0135391	1369	1	100
degrees	7	3	0.0135391	1369	1	100
delineate	9	3	0.0135391	1369	1	100
deliver	7	3	0.0135391	1369	1	100
delivered	9	3	0.0135391	1369	1	100
depended	8	3	0.0135391	1369	1	100
depleted	8	3	0.0135391	1369	1	100
describing	10	3	0.0135391	1369	1	100
designating	11	3	0.0135391	1369	1	100
determining	11	3	0.0135391	1369	1	100
differ	6	3	0.0135391	1369	1	100
differed	8	3	0.0135391	1369	1	100
differing	9	3	0.0135391	1369	1	100
difficulties	12	3	0.0135391	1369	1	100
dimension	9	3	0.0135391	1369	1	100
disciplinary	12	3	0.0135391	1369	1	100
disconnected	12	3	0.0135391	1369	1	100
discussions	11	3	0.0135391	1369	1	100
disproportionately	18	3	0.0135391	1369	1	100
diving	6	3	0.0135391	1369	1	100
dominate	8	3	0.0135391	1369	1	100
drawing	7	3	0.0135391	1369	1	100
driving	7	3	0.0135391	1369	1	100
ebm	3	3	0.0135391	1369	1	100
ecs	3	3	0.0135391	1369	1	100
efficiency	10	3	0.0135391	1369	1	100
emergent	8	3	0.0135391	1369	1	100
enable	6	3	0.0135391	1369	1	100
endemic	7	3	0.0135391	1369	1	100
enforcement	11	3	0.0135391	1369	1	100
engaged	7	3	0.0135391	1369	1	100
engagement	10	3	0.0135391	1369	1	100
enhancing	9	3	0.0135391	1369	1	100
ensuring	8	3	0.0135391	1369	1	100
entry	5	3	0.0135391	1369	1	100
errors	6	3	0.0135391	1369	1	100
estate	6	3	0.0135391	1369	1	100
ever	4	3	0.0135391	1369	1	100
evident	7	3	0.0135391	1369	1	100
evolution	9	3	0.0135391	1369	1	100
excluded	8	3	0.0135391	1369	1	100
exclusion	9	3	0.0135391	1369	1	100
executive	9	3	0.0135391	1369	1	100
exist	5	3	0.0135391	1369	1	100
exists	6	3	0.0135391	1369	1	100
expanded	8	3	0.0135391	1369	1	100
expanding	9	3	0.0135391	1369	1	100
expenditure	11	3	0.0135391	1369	1	100
expensive	9	3	0.0135391	1369	1	100
explanatory	11	3	0.0135391	1369	1	100
explored	8	3	0.0135391	1369	1	100
extend	6	3	0.0135391	1369	1	100
faced	5	3	0.0135391	1369	1	100
failed	6	3	0.0135391	1369	1	100
fit	3	3	0.0135391	1369	1	100
fixed	5	3	0.0135391	1369	1	100
flexibility	11	3	0.0135391	1369	1	100
florida	7	3	0.0135391	1369	1	100
former	6	3	0.0135391	1369	1	100
fulfil	6	3	0.0135391	1369	1	100
funding	7	3	0.0135391	1369	1	100
funds	5	3	0.0135391	1369	1	100
gained	6	3	0.0135391	1369	1	100
gears	5	3	0.0135391	1369	1	100
generalised	11	3	0.0135391	1369	1	100
generalized	11	3	0.0135391	1369	1	100
globe	5	3	0.0135391	1369	1	100
goods	5	3	0.0135391	1369	1	100
governability	13	3	0.0135391	1369	1	100
governing	9	3	0.0135391	1369	1	100
governmental	12	3	0.0135391	1369	1	100
guinea	6	3	0.0135391	1369	1	100
harvested	9	3	0.0135391	1369	1	100
harvests	8	3	0.0135391	1369	1	100
having	6	3	0.0135391	1369	1	100
healthy	7	3	0.0135391	1369	1	100
heavily	7	3	0.0135391	1369	1	100
held	4	3	0.0135391	1369	1	100
herbivorous	11	3	0.0135391	1369	1	100
heuristic	9	3	0.0135391	1369	1	100
hold	4	3	0.0135391	1369	1	100
holistic	8	3	0.0135391	1369	1	100
horizontal	10	3	0.0135391	1369	1	100
implement	9	3	0.0135391	1369	1	100
indicated	9	3	0.0135391	1369	1	100
industries	10	3	0.0135391	1369	1	100
influencing	11	3	0.0135391	1369	1	100
instead	7	3	0.0135391	1369	1	100
institutions	12	3	0.0135391	1369	1	100
insufficient	12	3	0.0135391	1369	1	100
intense	7	3	0.0135391	1369	1	100
inter	5	3	0.0135391	1369	1	100
interacting	11	3	0.0135391	1369	1	100
interaction	11	3	0.0135391	1369	1	100
interpreted	11	3	0.0135391	1369	1	100
interviews	10	3	0.0135391	1369	1	100
introduced	10	3	0.0135391	1369	1	100
introduction	12	3	0.0135391	1369	1	100
intuitive	9	3	0.0135391	1369	1	100
investments	11	3	0.0135391	1369	1	100
iterate	7	3	0.0135391	1369	1	100
iterative	9	3	0.0135391	1369	1	100
iv	2	3	0.0135391	1369	1	100
kernel	6	3	0.0135391	1369	1	100
km2	3	3	0.0135391	1369	1	100
la	2	3	0.0135391	1369	1	100
lagoon	6	3	0.0135391	1369	1	100
larval	6	3	0.0135391	1369	1	100
last	4	3	0.0135391	1369	1	100
later	5	3	0.0135391	1369	1	100
latter	6	3	0.0135391	1369	1	100
law	3	3	0.0135391	1369	1	100
leader	6	3	0.0135391	1369	1	100
leadership	10	3	0.0135391	1369	1	100
learning	8	3	0.0135391	1369	1	100
levins	6	3	0.0135391	1369	1	100
limit	5	3	0.0135391	1369	1	100
line	4	3	0.0135391	1369	1	100
link	4	3	0.0135391	1369	1	100
links	5	3	0.0135391	1369	1	100
lions	5	3	0.0135391	1369	1	100
list	4	3	0.0135391	1369	1	100
livelihoods	11	3	0.0135391	1369	1	100
majority	8	3	0.0135391	1369	1	100
male	4	3	0.0135391	1369	1	100
males	5	3	0.0135391	1369	1	100
mandates	8	3	0.0135391	1369	1	100
mapped	6	3	0.0135391	1369	1	100
market	6	3	0.0135391	1369	1	100
matter	6	3	0.0135391	1369	1	100
max50	5	3	0.0135391	1369	1	100
meant	5	3	0.0135391	1369	1	100
measurable	10	3	0.0135391	1369	1	100
measurement	11	3	0.0135391	1369	1	100
measurements	12	3	0.0135391	1369	1	100
members	7	3	0.0135391	1369	1	100
meso	4	3	0.0135391	1369	1	100
metric	6	3	0.0135391	1369	1	100
miles	5	3	0.0135391	1369	1	100
minimum	7	3	0.0135391	1369	1	100
minor	5	3	0.0135391	1369	1	100
mismatch	8	3	0.0135391	1369	1	100
mounds	6	3	0.0135391	1369	1	100
moved	5	3	0.0135391	1369	1	100
multilateral	12	3	0.0135391	1369	1	100
multitude	9	3	0.0135391	1369	1	100
negatively	10	3	0.0135391	1369	1	100
negotiations	12	3	0.0135391	1369	1	100
net	3	3	0.0135391	1369	1	100
newly	5	3	0.0135391	1369	1	100
ngos	4	3	0.0135391	1369	1	100
niche	5	3	0.0135391	1369	1	100
nm	2	3	0.0135391	1369	1	100
nonspatial	10	3	0.0135391	1369	1	100
noted	5	3	0.0135391	1369	1	100
observed	8	3	0.0135391	1369	1	100
occurred	8	3	0.0135391	1369	1	100
oil	3	3	0.0135391	1369	1	100
old	3	3	0.0135391	1369	1	100
operating	9	3	0.0135391	1369	1	100
operators	9	3	0.0135391	1369	1	100
opposed	7	3	0.0135391	1369	1	100
optimize	8	3	0.0135391	1369	1	100
orientations	12	3	0.0135391	1369	1	100
outcome	7	3	0.0135391	1369	1	100
overfished	10	3	0.0135391	1369	1	100
palma	5	3	0.0135391	1369	1	100
papua	5	3	0.0135391	1369	1	100
paradoxus	9	3	0.0135391	1369	1	100
partnership	11	3	0.0135391	1369	1	100
pas	3	3	0.0135391	1369	1	100
past	4	3	0.0135391	1369	1	100
perturbations	13	3	0.0135391	1369	1	100
physical	8	3	0.0135391	1369	1	100
platforms	9	3	0.0135391	1369	1	100
pmh	3	3	0.0135391	1369	1	100
pollution	9	3	0.0135391	1369	1	100
predators	9	3	0.0135391	1369	1	100
preliminary	11	3	0.0135391	1369	1	100
principally	11	3	0.0135391	1369	1	100
priori	6	3	0.0135391	1369	1	100
proactive	9	3	0.0135391	1369	1	100
procedure	9	3	0.0135391	1369	1	100
productive	10	3	0.0135391	1369	1	100
projected	9	3	0.0135391	1369	1	100
proposes	8	3	0.0135391	1369	1	100
protections	11	3	0.0135391	1369	1	100
provision	9	3	0.0135391	1369	1	100
purpose	7	3	0.0135391	1369	1	100
question	8	3	0.0135391	1369	1	100
raised	6	3	0.0135391	1369	1	100
random	6	3	0.0135391	1369	1	100
ranking	7	3	0.0135391	1369	1	100
reaching	8	3	0.0135391	1369	1	100
readily	7	3	0.0135391	1369	1	100
realistic	9	3	0.0135391	1369	1	100
reality	7	3	0.0135391	1369	1	100
recent	6	3	0.0135391	1369	1	100
recognized	10	3	0.0135391	1369	1	100
reducing	8	3	0.0135391	1369	1	100
regardless	10	3	0.0135391	1369	1	100
relating	8	3	0.0135391	1369	1	100
release	7	3	0.0135391	1369	1	100
reliance	8	3	0.0135391	1369	1	100
remote	6	3	0.0135391	1369	1	100
representativeness	18	3	0.0135391	1369	1	100
representing	12	3	0.0135391	1369	1	100
resilient	9	3	0.0135391	1369	1	100
respect	7	3	0.0135391	1369	1	100
responsible	11	3	0.0135391	1369	1	100
reveal	6	3	0.0135391	1369	1	100
reveals	7	3	0.0135391	1369	1	100
revenue	7	3	0.0135391	1369	1	100
rezoning	8	3	0.0135391	1369	1	100
rich	4	3	0.0135391	1369	1	100
roles	5	3	0.0135391	1369	1	100
run	3	3	0.0135391	1369	1	100
sampling	8	3	0.0135391	1369	1	100
satellite	9	3	0.0135391	1369	1	100
seabed	6	3	0.0135391	1369	1	100
seafloor	8	3	0.0135391	1369	1	100
seasons	7	3	0.0135391	1369	1	100
sedentary	9	3	0.0135391	1369	1	100
see	3	3	0.0135391	1369	1	100
semi	4	3	0.0135391	1369	1	100
sense	5	3	0.0135391	1369	1	100
sensing	7	3	0.0135391	1369	1	100
sensitive	9	3	0.0135391	1369	1	100
shape	5	3	0.0135391	1369	1	100
shifting	8	3	0.0135391	1369	1	100
simulation	10	3	0.0135391	1369	1	100
situations	10	3	0.0135391	1369	1	100
skills	6	3	0.0135391	1369	1	100
smce	4	3	0.0135391	1369	1	100
society	7	3	0.0135391	1369	1	100
solution	8	3	0.0135391	1369	1	100
southeast	9	3	0.0135391	1369	1	100
spatio	6	3	0.0135391	1369	1	100
step	4	3	0.0135391	1369	1	100
stochasticity	13	3	0.0135391	1369	1	100
strict	6	3	0.0135391	1369	1	100
sufficient	10	3	0.0135391	1369	1	100
sufficiently	12	3	0.0135391	1369	1	100
summarizes	10	3	0.0135391	1369	1	100
synthesis	9	3	0.0135391	1369	1	100
tagged	6	3	0.0135391	1369	1	100
tailored	8	3	0.0135391	1369	1	100
taking	6	3	0.0135391	1369	1	100
temporally	10	3	0.0135391	1369	1	100
tensions	8	3	0.0135391	1369	1	100
terrestrial	11	3	0.0135391	1369	1	100
territories	11	3	0.0135391	1369	1	100
thereby	7	3	0.0135391	1369	1	100
took	4	3	0.0135391	1369	1	100
tourism	7	3	0.0135391	1369	1	100
track	5	3	0.0135391	1369	1	100
training	8	3	0.0135391	1369	1	100
transboundary	13	3	0.0135391	1369	1	100
trust	5	3	0.0135391	1369	1	100
turnover	8	3	0.0135391	1369	1	100
turtles	7	3	0.0135391	1369	1	100
unintended	10	3	0.0135391	1369	1	100
upon	4	3	0.0135391	1369	1	100
upper	5	3	0.0135391	1369	1	100
uptake	6	3	0.0135391	1369	1	100
urchins	7	3	0.0135391	1369	1	100
us	2	3	0.0135391	1369	1	100
usually	7	3	0.0135391	1369	1	100
variety	7	3	0.0135391	1369	1	100
vessel	6	3	0.0135391	1369	1	100
viable	6	3	0.0135391	1369	1	100
vital	5	3	0.0135391	1369	1	100
weaknesses	10	3	0.0135391	1369	1	100
weight	6	3	0.0135391	1369	1	100
whereby	7	3	0.0135391	1369	1	100
whole	5	3	0.0135391	1369	1	100
willingness	11	3	0.0135391	1369	1	100
working	7	3	0.0135391	1369	1	100
younger	7	3	0.0135391	1369	1	100
zealand	7	3	0.0135391	1369	1	100
1970s	5	2	0.00902609	1747	1	100
abnj	4	2	0.00902609	1747	1	100
accelerating	12	2	0.00902609	1747	1	100
acceptability	13	2	0.00902609	1747	1	100
acceptance	10	2	0.00902609	1747	1	100
accomplished	12	2	0.00902609	1747	1	100
achieves	8	2	0.00902609	1747	1	100
acidification	13	2	0.00902609	1747	1	100
acknowledged	12	2	0.00902609	1747	1	100
actually	8	2	0.00902609	1747	1	100
acute	5	2	0.00902609	1747	1	100
adapt	5	2	0.00902609	1747	1	100
added	5	2	0.00902609	1747	1	100
adequately	10	2	0.00902609	1747	1	100
adjusting	9	2	0.00902609	1747	1	100
advanced	8	2	0.00902609	1747	1	100
advancing	9	2	0.00902609	1747	1	100
advantage	9	2	0.00902609	1747	1	100
adverse	7	2	0.00902609	1747	1	100
advocated	9	2	0.00902609	1747	1	100
affairs	7	2	0.00902609	1747	1	100
affects	7	2	0.00902609	1747	1	100
agardy	6	2	0.00902609	1747	1	100
aichi	5	2	0.00902609	1747	1	100
algorithm	9	2	0.00902609	1747	1	100
allocated	9	2	0.00902609	1747	1	100
allocation	10	2	0.00902609	1747	1	100
alongside	9	2	0.00902609	1747	1	100
already	7	2	0.00902609	1747	1	100
alternatives	12	2	0.00902609	1747	1	100
amongst	7	2	0.00902609	1747	1	100
analysed	8	2	0.00902609	1747	1	100
analytical	10	2	0.00902609	1747	1	100
analyzing	9	2	0.00902609	1747	1	100
angling	7	2	0.00902609	1747	1	100
animals	7	2	0.00902609	1747	1	100
announced	9	2	0.00902609	1747	1	100
annual	6	2	0.00902609	1747	1	100
appeared	8	2	0.00902609	1747	1	100
applicability	13	2	0.00902609	1747	1	100
apply	5	2	0.00902609	1747	1	100
areal	5	2	0.00902609	1747	1	100
argued	6	2	0.00902609	1747	1	100
arise	5	2	0.00902609	1747	1	100
arising	7	2	0.00902609	1747	1	100
asian	5	2	0.00902609	1747	1	100
assets	6	2	0.00902609	1747	1	100
assignment	10	2	0.00902609	1747	1	100
assume	6	2	0.00902609	1747	1	100
assumption	10	2	0.00902609	1747	1	100
attached	8	2	0.00902609	1747	1	100
attachment	10	2	0.00902609	1747	1	100
auc	3	2	0.00902609	1747	1	100
aware	5	2	0.00902609	1747	1	100
balancing	9	2	0.00902609	1747	1	100
barriers	8	2	0.00902609	1747	1	100
baseline	8	2	0.00902609	1747	1	100
bathymetry	10	2	0.00902609	1747	1	100
bayesian	8	2	0.00902609	1747	1	100
behaviours	10	2	0.00902609	1747	1	100
behind	6	2	0.00902609	1747	1	100
belgian	7	2	0.00902609	1747	1	100
believe	7	2	0.00902609	1747	1	100
benchmarks	10	2	0.00902609	1747	1	100
biases	6	2	0.00902609	1747	1	100
big	3	2	0.00902609	1747	1	100
bigger	6	2	0.00902609	1747	1	100
billfish	8	2	0.00902609	1747	1	100
binomial	8	2	0.00902609	1747	1	100
bioregional	11	2	0.00902609	1747	1	100
biosphere	9	2	0.00902609	1747	1	100
biota	5	2	0.00902609	1747	1	100
bodies	6	2	0.00902609	1747	1	100
bolster	7	2	0.00902609	1747	1	100
boosted	7	2	0.00902609	1747	1	100
bpns	4	2	0.00902609	1747	1	100
brazil	6	2	0.00902609	1747	1	100
brazilian	9	2	0.00902609	1747	1	100
briefly	7	2	0.00902609	1747	1	100
bring	5	2	0.00902609	1747	1	100
budget	6	2	0.00902609	1747	1	100
buffer	6	2	0.00902609	1747	1	100
bundle	6	2	0.00902609	1747	1	100
buy	3	2	0.00902609	1747	1	100
canadian	8	2	0.00902609	1747	1	100
carbon	6	2	0.00902609	1747	1	100
carefully	9	2	0.00902609	1747	1	100
carnivores	10	2	0.00902609	1747	1	100
cascades	8	2	0.00902609	1747	1	100
categorized	11	2	0.00902609	1747	1	100
centropomus	11	2	0.00902609	1747	1	100
cessation	9	2	0.00902609	1747	1	100
chagos	6	2	0.00902609	1747	1	100
chance	6	2	0.00902609	1747	1	100
characterize	12	2	0.00902609	1747	1	100
choose	6	2	0.00902609	1747	1	100
circumstances	13	2	0.00902609	1747	1	100
class	5	2	0.00902609	1747	1	100
classifications	15	2	0.00902609	1747	1	100
close	5	2	0.00902609	1747	1	100
closely	7	2	0.00902609	1747	1	100
cluster	7	2	0.00902609	1747	1	100
coarse	6	2	0.00902609	1747	1	100
coherence	9	2	0.00902609	1747	1	100
collaborated	12	2	0.00902609	1747	1	100
collected	9	2	0.00902609	1747	1	100
colony	6	2	0.00902609	1747	1	100
combine	7	2	0.00902609	1747	1	100
coming	6	2	0.00902609	1747	1	100
commentary	10	2	0.00902609	1747	1	100
commitment	10	2	0.00902609	1747	1	100
commonly	8	2	0.00902609	1747	1	100
compelling	10	2	0.00902609	1747	1	100
competitors	11	2	0.00902609	1747	1	100
completed	9	2	0.00902609	1747	1	100
completely	10	2	0.00902609	1747	1	100
compromise	10	2	0.00902609	1747	1	100
computational	13	2	0.00902609	1747	1	100
concentration	13	2	0.00902609	1747	1	100
concerned	9	2	0.00902609	1747	1	100
concerning	10	2	0.00902609	1747	1	100
concludes	9	2	0.00902609	1747	1	100
conclusions	11	2	0.00902609	1747	1	100
configuration	13	2	0.00902609	1747	1	100
conservationists	16	2	0.00902609	1747	1	100
constitute	10	2	0.00902609	1747	1	100
constraints	11	2	0.00902609	1747	1	100
constructively	14	2	0.00902609	1747	1	100
consultations	13	2	0.00902609	1747	1	100
continental	11	2	0.00902609	1747	1	100
contingent	10	2	0.00902609	1747	1	100
continuity	10	2	0.00902609	1747	1	100
contributions	13	2	0.00902609	1747	1	100
convergence	11	2	0.00902609	1747	1	100
counter	7	2	0.00902609	1747	1	100
counterintuitive	16	2	0.00902609	1747	1	100
county	6	2	0.00902609	1747	1	100
crdbr	5	2	0.00902609	1747	1	100
creates	7	2	0.00902609	1747	1	100
criticisms	10	2	0.00902609	1747	1	100
crown	5	2	0.00902609	1747	1	100
currents	8	2	0.00902609	1747	1	100
customized	10	2	0.00902609	1747	1	100
cyclical	8	2	0.00902609	1747	1	100
dataset	7	2	0.00902609	1747	1	100
day	3	2	0.00902609	1747	1	100
debate	6	2	0.00902609	1747	1	100
declined	8	2	0.00902609	1747	1	100
dedicated	9	2	0.00902609	1747	1	100
definition	10	2	0.00902609	1747	1	100
defmsp	6	2	0.00902609	1747	1	100
degraded	8	2	0.00902609	1747	1	100
deliberative	12	2	0.00902609	1747	1	100
delineation	11	2	0.00902609	1747	1	100
demonstrating	13	2	0.00902609	1747	1	100
densities	9	2	0.00902609	1747	1	100
departments	11	2	0.00902609	1747	1	100
dependence	10	2	0.00902609	1747	1	100
dependency	10	2	0.00902609	1747	1	100
depending	9	2	0.00902609	1747	1	100
derive	6	2	0.00902609	1747	1	100
deriving	8	2	0.00902609	1747	1	100
describes	9	2	0.00902609	1747	1	100
desirable	9	2	0.00902609	1747	1	100
desired	7	2	0.00902609	1747	1	100
diet	4	2	0.00902609	1747	1	100
differentiation	15	2	0.00902609	1747	1	100
diffusive	9	2	0.00902609	1747	1	100
dimensional	11	2	0.00902609	1747	1	100
diminishing	11	2	0.00902609	1747	1	100
displace	8	2	0.00902609	1747	1	100
distant	7	2	0.00902609	1747	1	100
documenting	11	2	0.00902609	1747	1	100
doing	5	2	0.00902609	1747	1	100
donor	5	2	0.00902609	1747	1	100
drawn	5	2	0.00902609	1747	1	100
dredging	8	2	0.00902609	1747	1	100
eastport	8	2	0.00902609	1747	1	100
easy	4	2	0.00902609	1747	1	100
edgar	5	2	0.00902609	1747	1	100
eez	3	2	0.00902609	1747	1	100
efzs	4	2	0.00902609	1747	1	100
egadi	5	2	0.00902609	1747	1	100
egg	3	2	0.00902609	1747	1	100
eggs	4	2	0.00902609	1747	1	100
eleven	6	2	0.00902609	1747	1	100
elsevier	8	2	0.00902609	1747	1	100
emerge	6	2	0.00902609	1747	1	100
emerged	7	2	0.00902609	1747	1	100
emphasis	8	2	0.00902609	1747	1	100
emphasizes	10	2	0.00902609	1747	1	100
encounters	10	2	0.00902609	1747	1	100
endemism	8	2	0.00902609	1747	1	100
endorsed	8	2	0.00902609	1747	1	100
ensured	7	2	0.00902609	1747	1	100
entirely	8	2	0.00902609	1747	1	100
equally	7	2	0.00902609	1747	1	100
equilibrium	11	2	0.00902609	1747	1	100
establishes	11	2	0.00902609	1747	1	100
estimating	10	2	0.00902609	1747	1	100
estuary	7	2	0.00902609	1747	1	100
etc	3	2	0.00902609	1747	1	100
everyone	8	2	0.00902609	1747	1	100
evolve	6	2	0.00902609	1747	1	100
evolved	7	2	0.00902609	1747	1	100
examines	8	2	0.00902609	1747	1	100
examining	9	2	0.00902609	1747	1	100
exchange	8	2	0.00902609	1747	1	100
exercise	8	2	0.00902609	1747	1	100
existence	9	2	0.00902609	1747	1	100
expanse	7	2	0.00902609	1747	1	100
experiments	11	2	0.00902609	1747	1	100
expertise	9	2	0.00902609	1747	1	100
exploit	7	2	0.00902609	1747	1	100
exploring	9	2	0.00902609	1747	1	100
expressed	9	2	0.00902609	1747	1	100
extension	9	2	0.00902609	1747	1	100
extensively	11	2	0.00902609	1747	1	100
extents	7	2	0.00902609	1747	1	100
external	8	2	0.00902609	1747	1	100
extreme	7	2	0.00902609	1747	1	100
extremely	9	2	0.00902609	1747	1	100
facets	6	2	0.00902609	1747	1	100
facilitated	11	2	0.00902609	1747	1	100
facing	6	2	0.00902609	1747	1	100
fact	4	2	0.00902609	1747	1	100
fails	5	2	0.00902609	1747	1	100
fair	4	2	0.00902609	1747	1	100
farming	7	2	0.00902609	1747	1	100
feasibility	11	2	0.00902609	1747	1	100
feed	4	2	0.00902609	1747	1	100
feedback	8	2	0.00902609	1747	1	100
fertilization	13	2	0.00902609	1747	1	100
fidelity	8	2	0.00902609	1747	1	100
fill	4	2	0.00902609	1747	1	100
financial	9	2	0.00902609	1747	1	100
finely	6	2	0.00902609	1747	1	100
fisherman	9	2	0.00902609	1747	1	100
flaws	5	2	0.00902609	1747	1	100
flows	5	2	0.00902609	1747	1	100
focal	5	2	0.00902609	1747	1	100
focusing	8	2	0.00902609	1747	1	100
forging	7	2	0.00902609	1747	1	100
formal	6	2	0.00902609	1747	1	100
forming	7	2	0.00902609	1747	1	100
forms	5	2	0.00902609	1747	1	100
formulated	10	2	0.00902609	1747	1	100
fourteen	8	2	0.00902609	1747	1	100
fra	3	2	0.00902609	1747	1	100
fraction	8	2	0.00902609	1747	1	100
framing	7	2	0.00902609	1747	1	100
[truncated: 2,107 more rows]

## Sheet: Chi2 outside Brazil (B1)
Supplementary Material B1: Chi-square value
Class 1												Class 2												Class 3

## Sheet: Chi2 inside Brazil +Local (B2)
Supplementary Material B2: Chi-square value
Class 1										Class 2										Class 3										Class 4

## Sheet: Lexical search (C1)
Supplementary Material C1: Lexical search
Context	Section	Analysis	Process	Search words	Hits	Context	Section	Analysis	Process	Search words	Hits	Documents	% do total de trabalho	Context	Section	Analysis	Process	Search words	Hits	Documents	% do total de trabalho
inside Brazil	whole documents	lexical search	no changes in the documents. PDFs used.	"spatial planning" "planejamento espacial"	0	inside Brazil	whole documents	lexical search	no changes in the documents. PDFs used.	"spatial planning" "planejamento espacial"	38	6	0.375	outside Brazil	whole documents	lexical search	no changes in the documents. PDFs used.	"spatial planning"	526	84	0.756757
inside Brazil	whole documents	lexical search	no changes in the documents. PDFs used.	"marine spatial planning" "planejamento espacial marinho"	0	inside Brazil	whole documents	lexical search	no changes in the documents. PDFs used.	"marine spatial planning" "planejamento espacial marinho"	22	4	0.25	outside Brazil	whole documents	lexical search	no changes in the documents. PDFs used.	"marine spatial planning"	366	69	0.621622
inside Brazil	whole documents	lexical search	no changes in the documents. PDFs used.	"spatial management" "manejo espacial" "gestão espacial"	0	inside Brazil	whole documents	lexical search	no changes in the documents. PDFs used.	"spatial management" "manejo espacial" "gestão espacial"	14	8	0.5	outside Brazil	whole documents	lexical search	no changes in the documents. PDFs used.	"spatial management"	475	71	0.63964
inside Brazil	whole documents	lexical search	no changes in the documents. PDFs used.	"protected area*" "área* protegida*" "unidade* de conserva*"	53	inside Brazil	whole documents	lexical search	no changes in the documents. PDFs used.	"protected area*" "área* protegida*" "unidade* de conserva*"	1232	15	0.9375	outside Brazil	whole documents	lexical search	no changes in the documents. PDFs used.	"protected area*"	2123	111	1
inside Brazil	whole documents	lexical search	no changes in the documents. PDFs used.	"MSP" "PEM"	0	inside Brazil	whole documents	lexical search	no changes in the documents. PDFs used.	"MSP" "PEM"	29	2	0.125	outside Brazil	whole documents	lexical search	no changes in the documents. PDFs used.	"MSP"	376	27	0.243243
inside Brazil	whole documents	lexical search	no changes in the documents. PDFs used.	"conflict*" "conflito*"	22	inside Brazil	whole documents	lexical search	no changes in the documents. PDFs used.	"conflict*" "conflito*"	561	14	0.875	outside Brazil	whole documents	lexical search	no changes in the documents. PDFs used.	"conflict*"	505	73	0.657658
inside Brazil	whole documents	lexical search	no changes in the documents. PDFs used.	“zoneamento” “zoning”	7	inside Brazil	whole documents	lexical search	no changes in the documents. PDFs used.	“zoneamento” “zoning”	295	15	0.9375	outside Brazil	whole documents	lexical search	no changes in the documents. PDFs used.	"zoning"	573	64	0.576577
inside Brazil	whole documents	lexical search	no changes in the documents. PDFs used.	"small-scale fish*" "pesca de pequena escala" "pesca artesanal" "artisanal fisheries"	4	inside Brazil	whole documents	lexical search	no changes in the documents. PDFs used.	"small-scale fish*" "pesca de pequena escala" "pesca artesanal" "artisanal fisheries"	270	10	0.625	outside Brazil	whole documents	lexical search	no changes in the documents. PDFs used.	"small-scale fish*"	109	13	0.117117
inside Brazil	whole documents	lexical search	no changes in the documents. PDFs used.	"fishermen's knowledge" "local ecological knowledge" "traditional knowledge" "local knowledge" "traditional ecological knowledge" "conhecimento ecológico local" "conhecimento local" "conhecimento tradicional"	1	inside Brazil	whole documents	lexical search	no changes in the documents. PDFs used.	"fishermen's knowledge" "local ecological knowledge" "traditional knowledge" "local knowledge" "traditional ecological knowledge" "conhecimento ecológico local" "conhecimento local" "conhecimento tradicional"	110	10	0.625	outside Brazil	whole documents	lexical search	no changes in the documents. PDFs used.	"fishermen's knowledge" "local ecological knowledge" "traditional knowledge" "local knowledge" "traditional ecological knowledge"	67	23	0.207207
inside Brazil	whole documents	lexical search	no changes in the documents. PDFs used.	"GIS" "SIG"	0	inside Brazil	whole documents	lexical search	no changes in the documents. PDFs used.	"GIS" "SIG"	28	6	0.375	outside Brazil	whole documents	lexical search	no changes in the documents. PDFs used.	GIS	228	50	0.45045
inside Brazil	whole documents	lexical search	no changes in the documents. PDFs used.	"scale*" "escala*"	1	inside Brazil	whole documents	lexical search	no changes in the documents. PDFs used.	"scale*" "escala*"	240	11	0.6875	outside Brazil	whole documents	lexical search	no changes in the documents. PDFs used.	"scale*" without "small-scale"	70	70	0.630631
inside Brazil	whole documents	lexical search	no changes in the documents. PDFs used.	"spatial scale*" "spatial and temporal scale*" "spatiotemporal scale*" "escala temporal" "escala espacial" "escala espaço-temporal" "escalas espaciais" "escalas temporais" "escalas espaço-temporais"	0	inside Brazil	whole documents	lexical search	no changes in the documents. PDFs used.	"spatial scale*" "spatial and temporal scale*" "spatiotemporal scale*" "escala temporal" "escala espacial" "escala espaço-temporal" "escalas espaciais" "escalas temporais" "escalas espaço-temporais"	25	4	0.25	outside Brazil	whole documents	lexical search	no changes in the documents. PDFs used.	"spatial scale*" "spatial and temporal scale*" "spatiotemporal scale*"	87	42	0.378378
inside Brazil	whole documents	lexical search	no changes in the documents. PDFs used.	"marxan" "marzone"	0	inside Brazil	whole documents	lexical search	no changes in the documents. PDFs used.	"marxan" "marzone"	52	3	0.1875	outside Brazil	whole documents	lexical search	no changes in the documents. PDFs used.	"marxan" "marzone"	347	35	0.315315
inside Brazil	whole documents	lexical search	no changes in the documents. PDFs used.	"conservation planning" "planejamento para a conservação"	0	inside Brazil	whole documents	lexical search	no changes in the documents. PDFs used.	"conservation planning" "planejamento para a conservação"	52	3	0.1875	outside Brazil	whole documents	lexical search	no changes in the documents. PDFs used.	"conservation planning"	347	35	0.315315
inside Brazil	whole documents	lexical search	no changes in the documents. PDFs used.	"mapping" "mapeamento"	1	inside Brazil	whole documents	lexical search	no changes in the documents. PDFs used.	"mapping" "mapeamento"	268	9	0.5625	outside Brazil	whole documents	lexical search	no changes in the documents. PDFs used.	"mapping"	133	46	0.414414
inside Brazil	whole documents	lexical search	no changes in the documents. PDFs used.	"governance" "governança"	0	inside Brazil	whole documents	lexical search	no changes in the documents. PDFs used.	"governance" "governança"	48	8	0.5	outside Brazil	whole documents	lexical search	no changes in the documents. PDFs used.	"governance"	461	56	0.504505
inside Brazil	whole documents	lexical search	no changes in the documents. PDFs used.	"social-ecological system*" "sistema* sócio-ecológico*"	0	inside Brazil	whole documents	lexical search	no changes in the documents. PDFs used.	"social-ecological system*" "sistema* sócio-ecológico*"	3	2	0.125	outside Brazil	whole documents	lexical search	no changes in the documents. PDFs used.	"social-ecological system*"	11	5	0.045045
inside Brazil	whole documents	lexical search	no changes in the documents. PDFs used.	"tenure" "posse" "propriedade"	5	inside Brazil	whole documents	lexical search	no changes in the documents. PDFs used.	"tenure" "posse" "propriedade"	232	12	0.75	outside Brazil	whole documents	lexical search	no changes in the documents. PDFs used.	"tenure"	42	9	0.0810811
inside Brazil	whole documents	lexical search	no changes in the documents. PDFs used.	"ecosystem-based" "base ecossistemica"	0	inside Brazil	whole documents	lexical search	no changes in the documents. PDFs used.	"ecosystem-based" "base ecossistemica"	12	5	0.3125	outside Brazil	whole documents	lexical search	no changes in the documents. PDFs used.	"ecosystem-based"	230	64	0.576577
inside Brazil	whole documents	lexical search	no changes in the documents. PDFs used.	participation participatory participação participativ*	60	inside Brazil	whole documents	lexical search	no changes in the documents. PDFs used.	participation participatory participação participativ*	1057	13	0.8125	outside Brazil	whole documents	lexical search	no changes in the documents. PDFs used.	"participation" "participatory"	257	58	0.522523
inside Brazil	whole documents	lexical search	no changes in the documents. PDFs used.	"participatory mapping" "mapeamento participativo" "cartografia social"	0	inside Brazil	whole documents	lexical search	no changes in the documents. PDFs used.	"participatory mapping" "mapeamento participativo" "cartografia social"	97	2	0.125	outside Brazil	whole documents	lexical search	no changes in the documents. PDFs used.	"participatory mapping"	0	0	0
inside Brazil	whole documents	lexical search	no changes in the documents. PDFs used.	"modelling" "modeling" "modelagem"	0	inside Brazil	whole documents	lexical search	no changes in the documents. PDFs used.	"modelling" "modeling" "modelagem"	31	10	0.625	outside Brazil	whole documents	lexical search	no changes in the documents. PDFs used.	"modelling" "modeling"	401	73	0.657658
inside Brazil	whole documents	lexical search	no changes in the documents. PDFs used.	"stakeholder*" "atores"	8	inside Brazil	whole documents	lexical search	no changes in the documents. PDFs used.	"stakeholder*" "atores"	286	12	0.75	outside Brazil	whole documents	lexical search	no changes in the documents. PDFs used.	"stakeholder*"	985	79	0.711712
inside Brazil	whole documents	lexical search	no changes in the documents. PDFs used.	"biodiversity*" "biodiversidade"	22	inside Brazil	whole documents	lexical search	no changes in the documents. PDFs used.	"biodiversity*" "biodiversidade"	494	15	0.9375	outside Brazil	whole documents	lexical search	no changes in the documents. PDFs used.	"biodiversity*"	1340	97	0.873874
inside Brazil	whole documents	lexical search	no changes in the documents. PDFs used.	"ecosystem service*" "serviço* ecossistêmico*" "serviço* ambienta*"	0	inside Brazil	whole documents	lexical search	no changes in the documents. PDFs used.	"ecosystem service*" "serviço* ecossistêmico*" "serviço* ambienta*"	39	8	0.5	outside Brazil	whole documents	lexical search	no changes in the documents. PDFs used.	"ecosystem service*"	238	40	0.36036
inside Brazil	whole documents	lexical search	no changes in the documents. PDFs used.	"fishery" "fisheries" "fishing" "pesca*" "pesqueir*" "pescaria*"	110	inside Brazil	whole documents	lexical search	no changes in the documents. PDFs used.	"fishery" "fisheries" "fishing" "pesca*" "pesqueir*" "pescaria*"	5877	16	1	outside Brazil	whole documents	lexical search	no changes in the documents. PDFs used.	"fishery" "fisheries" "fishing"	7382	110	0.990991
inside Brazil	whole documents	lexical search	no changes in the documents. PDFs used.	"blue growth" "blue economy" "economia azul" "crescimento azul"	0	inside Brazil	whole documents	lexical search	no changes in the documents. PDFs used.	"blue growth" "blue economy" "economia azul" "crescimento azul"	0	0	0	outside Brazil	whole documents	lexical search	no changes in the documents. PDFs used.	"blue growth" "blue economy"	55	6	0.0540541
inside Brazil	whole documents	lexical search	no changes in the documents. PDFs used.	"collaboration" "collaborative" "colaboração" "colaborativ*" "colaborações"	1	inside Brazil	whole documents	lexical search	no changes in the documents. PDFs used.	"collaboration" "collaborative" "colaboração" "colaborativ*" "colaborações"	25	11	0.6875	outside Brazil	whole documents	lexical search	no changes in the documents. PDFs used.	"collaboration" "collaborative"	203	48	0.432432
inside Brazil	whole documents	lexical search	no changes in the documents. PDFs used.	"resilience"	1	inside Brazil	whole documents	lexical search	no changes in the documents. PDFs used.	"resilience"	50	5	0.3125	outside Brazil	whole documents	lexical search	no changes in the documents. PDFs used.	"resilience"	389	51	0.459459
inside Brazil	whole documents	lexical search	no changes in the documents. PDFs used.	"trade-off*" "tradeoff*"	0	inside Brazil	whole documents	lexical search	no changes in the documents. PDFs used.	"trade-off*" "tradeoff*"	6	5	0.3125	outside Brazil	whole documents	lexical search	no changes in the documents. PDFs used.	"trade-off*" "tradeoff*"	116	42	0.378378
inside Brazil	whole documents	lexical search	no changes in the documents. PDFs used.	"systematic conservation" "systematic planning" "systematic management" "manejo sistemático" "planejamento sistemático" "conservação sistemática"	0	inside Brazil	whole documents	lexical search	no changes in the documents. PDFs used.	"systematic conservation" "systematic planning" "systematic management" "manejo sistemático" "planejamento sistemático" "conservação sistemática"	28	3	0.1875	outside Brazil	whole documents	lexical search	no changes in the documents. PDFs used.	"systematic conservation" "systematic planning" "systematic management"	100	26	0.234234
inside Brazil	whole documents	lexical search	no changes in the documents. PDFs used.	"territor*" "territór*"	47	inside Brazil	whole documents	lexical search	no changes in the documents. PDFs used.	"territor*" "territór*"	756	13	0.8125	outside Brazil	whole documents	lexical search	no changes in the documents. PDFs used.	"territor*"	182	43	0.387387
inside Brazil	whole documents	lexical search	no changes in the documents. PDFs used.	“social* network analys?s” "análise* sócio-ecológica*" "análise* sócioecológica*"	0	inside Brazil	whole documents	lexical search	no changes in the documents. PDFs used.	“social* network analys?s” "análise* sócio-ecológica*" "análise* sócioecológica*"	1	1	0.0625	outside Brazil	whole documents	lexical search	no changes in the documents. PDFs used.	“social* network analys?s”	0	0	0
inside Brazil	whole documents	lexical search	no changes in the documents. PDFs used.	"integrated management" "gestão integrada" "manejo integrado"	2	inside Brazil	whole documents	lexical search	no changes in the documents. PDFs used.	"integrated management" "gestão integrada" "manejo integrado"	12	6	0.375	outside Brazil	whole documents	lexical search	no changes in the documents. PDFs used.	"integrated management"	45	14	0.126126
inside Brazil	whole documents	lexical search	no changes in the documents. PDFs used.	"management plan" "plano de manejo" "plano de gestão"	33	inside Brazil	whole documents	lexical search	no changes in the documents. PDFs used.	"management plan" "plano de manejo" "plano de gestão"	158	12	0.75	outside Brazil	whole documents	lexical search	no changes in the documents. PDFs used.	"management plan"	141	48	0.432432
inside Brazil	whole documents	lexical search	no changes in the documents. PDFs used.	"zon*"	19	inside Brazil	whole documents	lexical search	no changes in the documents. PDFs used.	"zon*"	817	15	0.9375	outside Brazil	whole documents	lexical search	no changes in the documents. PDFs used.	"zon*"	2072	106	0.954955
inside Brazil	whole documents	lexical search	no changes in the documents. PDFs used.	"sustainability" "sustentabilidade"	114	inside Brazil	whole documents	lexical search	no changes in the documents. PDFs used.	"sustainability" "sustentabilidade"	112	11	0.6875	outside Brazil	whole documents	lexical search	no changes in the documents. PDFs used.	"sustainability"	179	64	0.576577
inside Brazil	whole documents	lexical search	no changes in the documents. PDFs used.	"rede de unidades" "rede de áreas" network* "redes de unidades" "redes de áreas"	3	inside Brazil	whole documents	lexical search	no changes in the documents. PDFs used.	"rede de unidades" "rede de áreas" network* "redes de unidades" "redes de áreas"	37	7	0.4375	outside Brazil	whole documents	lexical search	no changes in the documents. PDFs used.	"network"	1924	105	0.945946
inside Brazil	whole documents	lexical search	no changes in the documents. PDFs used.	"human dimension*" "dimensões humanas" "dimensão humana"	0	inside Brazil	whole documents	lexical search	no changes in the documents. PDFs used.	"human dimension*" "dimensões humanas" "dimensão humana"	4	4	0.25	outside Brazil	whole documents	lexical search	no changes in the documents. PDFs used.	"human dimensions"	41	8	0.0720721
inside Brazil	whole documents	lexical search	no changes in the documents. PDFs used.	"*ecology" "*ecologia"	3	inside Brazil	whole documents	lexical search	no changes in the documents. PDFs used.	"*ecology" "*ecologia"	274	15	0.9375	outside Brazil	whole documents	lexical search	no changes in the documents. PDFs used.	"*ecology"	664	84	0.756757
inside Brazil	whole documents	lexical search	no changes in the documents. PDFs used.	"offshore" "off-shore" "alto-mar" "altomar" "alto mar"	1	inside Brazil	whole documents	lexical search	no changes in the documents. PDFs used.	"offshore" "off-shore" "alto-mar" "altomar" "alto mar"	41	8	0.5	outside Brazil	whole documents	lexical search	no changes in the documents. PDFs used.	"offshore" "off-shore"	481	66	0.594595
inside Brazil	whole documents	lexical search	no changes in the documents. PDFs used.	"fisheries management" "manejo da pesca" "manejo pesqueiro" "gestão da pesca" "gestão pesqueira"	0	inside Brazil	whole documents	lexical search	no changes in the documents. PDFs used.	"fisheries management" "manejo da pesca" "manejo pesqueiro" "gestão da pesca" "gestão pesqueira"	55	11	0.6875	outside Brazil	whole documents	lexical search	no changes in the documents. PDFs used.	"fisheries management"	360	78	0.702703
inside Brazil	whole documents	lexical search	no changes in the documents. PDFs used.	"rezoning" "rezoneamento"	0	inside Brazil	whole documents	lexical search	no changes in the documents. PDFs used.	"rezoning" "rezoneamento"	0	0	0	outside Brazil	whole documents	lexical search	no changes in the documents. PDFs used.	"rezoning"	68	10	0.0900901
inside Brazil	whole documents	lexical search	no changes in the documents. PDFs used.	policy policies política*	30	inside Brazil	whole documents	lexical search	no changes in the documents. PDFs used.	policy policies política*	532	16	1	outside Brazil	whole documents	lexical search	no changes in the documents. PDFs used.	policy	1158	97	0.873874
inside Brazil	whole documents	lexical search	no changes in the documents. PDFs used.	"scientific" "science*" ciência* científic*	30	inside Brazil	whole documents	lexical search	no changes in the documents. PDFs used.	"scientific" "science*" ciência* científic*	487	16	1	outside Brazil	whole documents	lexical search	no changes in the documents. PDFs used.	"scientific" "science*"	2835	110	0.990991
inside Brazil	whole documents	lexical search	no changes in the documents. PDFs used.	"climate change" "global warming" "sea level rise" "sea-level rise" "mudança* climática*" "aumento do nível do mar" "aquecimento global"	0	inside Brazil	whole documents	lexical search	no changes in the documents. PDFs used.	"climate change" "global warming" "sea level rise" "sea-level rise" "mudança* climática*" "aumento do nível do mar" "aquecimento global"	69	6	0.375	outside Brazil	whole documents	lexical search	no changes in the documents. PDFs used.	"climate change" "global warming" "sea level rise" "sea-level rise"	515	63	0.567568
inside Brazil	whole documents	lexical search	no changes in the documents. PDFs used.	"co-management" "comanagement" "co-manejo" "comanejo" "co-gestão" "cogestão"	0	inside Brazil	whole documents	lexical search	no changes in the documents. PDFs used.	"co-management" "comanagement" "co-manejo" "comanejo" "co-gestão" "cogestão"	37	7	0.4375	outside Brazil	whole documents	lexical search	no changes in the documents. PDFs used.	"co-management" "comanagement"	84	22	0.198198
inside Brazil	whole documents	lexical search	no changes in the documents. PDFs used.	"connectivity" "interconnected*" "conectividade" "interconect*"	0	inside Brazil	whole documents	lexical search	no changes in the documents. PDFs used.	"connectivity" "interconnected*" "conectividade" "interconect*"	28	9	0.5625	outside Brazil	whole documents	lexical search	no changes in the documents. PDFs used.	"connectivity" "interconnected*"	498	54	0.486486
inside Brazil	whole documents	lexical search	no changes in the documents. PDFs used.	Marine maritime oceans seas ocean sea seabed seafloor mares mar marinha marinho marinhos marinhas marítimo marítima marítimos marítimas oceanos oceano oceânico oceânicos oceânica oceânicas	144	inside Brazil	whole documents	lexical search	no changes in the documents. PDFs used.	Marine maritime oceans seas ocean sea seabed seafloor mares mar marinha marinho marinhos marinhas marítimo marítima marítimos marítimas oceanos oceano oceânico oceânicos oceânica oceânicas	2227	16	1	outside Brazil	whole documents	lexical search	no changes in the documents. PDFs used.	Marine maritime oceans seas ocean sea seabed seafloor	18164	111	1
inside Brazil	whole documents	lexical search	no changes in the documents. PDFs used.	amortec* buffer*	2	inside Brazil	whole documents	lexical search	no changes in the documents. PDFs used.	amortec* buffer*	28	7	0.4375	outside Brazil	whole documents	lexical search	no changes in the documents. PDFs used.	buffer*	142	41	0.369369
inside Brazil	whole documents	lexical search	no changes in the documents. PDFs used.	no-take "área* de exclusão" "zona* de exclusão"	0	inside Brazil	whole documents	lexical search	no changes in the documents. PDFs used.	no-take "área* de exclusão" "zona* de exclusão"	35	7	0.4375	outside Brazil	whole documents	lexical search	no changes in the documents. PDFs used.	"no-take"	729	75	0.675676
inside Brazil	whole documents	lexical search	no changes in the documents. PDFs used.	"limited-take" "partial-take" "uso parcial" "uso limitado" "uso restrito"	1	inside Brazil	whole documents	lexical search	no changes in the documents. PDFs used.	"limited-take" "partial-take" "uso parcial" "uso limitado" "uso restrito"	1	1	0.0625	outside Brazil	whole documents	lexical search	no changes in the documents. PDFs used.	"limited-take" "partial-take"	23	3	0.027027
inside Brazil	whole documents	lexical search	no changes in the documents. PDFs used.	"MSP'ing"	0	inside Brazil	whole documents	lexical search	no changes in the documents. PDFs used.	"MSP'ing"	0	0	0	outside Brazil	whole documents	lexical search	no changes in the documents. PDFs used.	"MSP'ing"	2	1	0.00900901
inside Brazil	whole documents	lexical search	no changes in the documents. PDFs used.	sustainable-use "sustainable use" "uso* sustentável"	22	inside Brazil	whole documents	lexical search	no changes in the documents. PDFs used.	sustainable-use "sustainable use" "uso* sustentável"	234	14	0.875	outside Brazil	whole documents	lexical search	no changes in the documents. PDFs used.	"sustainable-use" "sustainable use"	78	24	0.216216
inside Brazil	whole documents	lexical search	no changes in the documents. PDFs used.	coast* costeir* costa*	29	inside Brazil	whole documents	lexical search	no changes in the documents. PDFs used.	coast* costeir* costa*	841	15	0.9375	outside Brazil	whole documents	lexical search	no changes in the documents. PDFs used.	coast*	2892	109	0.981982
												464								2913

## Sheet: Lexical search categories (C2)
Supplementary Material C2: Lexical search categories
Related to	Lexical search
Spatial planning and zoning	"spatial planning" "planejamento espacial"
	"marine spatial planning" "planejamento espacial marinho"
	"spatial management" "manejo espacial" "gestão espacial"
	"scale*" "escala*"
	"spatial scale*" "spatial and temporal scale*" "spatiotemporal scale*" "escala temporal" "escala espacial" "escala espaço-temporal" "escalas espaciais" "escalas temporais" "escalas espaço-temporais"
	"territor*" "territór*"
	"integrated management" "gestão integrada" "manejo integrado"
	"MSP'ing"
	no-take "área* de exclusão" "zona* de exclusão"
	"limited-take" "partial-take" "uso parcial" "uso limitado" "uso restrito"
	"MSP" "PEM"
	"zon*"
	"rezoning" "rezoneamento"
	“zoneamento” “zoning”
	amortec* buffer*
	"management plan" "plano de manejo" "plano de gestão"
Social, politic, and economic approach	"conflict*" "conflito*"
	"small-scale fish*" "pesca de pequena escala" "pesca artesanal" "artisanal fisheries"
	"fishermen's knowledge" "local ecological knowledge" "traditional knowledge" "local knowledge" "traditional ecological knowledge" "conhecimento ecológico local" "conhecimento local" "conhecimento tradicional"
	"governance" "governança"
	"social-ecological system*" "sistema* sócio-ecológico*"
	"tenure" "posse" "propriedade"
	participation participatory participação participativ*
	"stakeholder*" "atores"
	"collaboration" "collaborative" "colaboração" "colaborativ*" "colaborações"
	"resilience"
	"trade-off*" "tradeoff*"
	“social* network analys?s” "análise* sócio-ecológica*" "análise* sócioecológica*"
	"rede de unidades" "rede de áreas" network* "redes de unidades" "redes de áreas"
	"blue growth" "blue economy" "economia azul" "crescimento azul"
	"human dimension*" "dimensões humanas" "dimensão humana"
	"fisheries management" "manejo da pesca" "manejo pesqueiro" "gestão da pesca" "gestão pesqueira"
	policy policies política*
	"co-management" "comanagement" "co-manejo" "comanejo" "co-gestão" "cogestão"
	"connectivity" "interconnected*" "conectividade" "interconect*"
Ecological and environmental approach	"ecosystem-based" "base ecossistemica"
	"biodiversity*" "biodiversidade"
	"ecosystem service*" "serviço* ecossistêmico*" "serviço* ambienta*"
	"fishery" "fisheries" "fishing" "pesca*" "pesqueir*" "pescaria*"
	"*ecology" "*ecologia"
	"climate change" "global warming" "sea level rise" "sea-level rise" "mudança* climática*" "aumento do nível do mar" "aquecimento global"
Tools and applications	"GIS" "SIG"
	"marxan" "marzone"
	"mapping" "mapeamento"
	"participatory mapping" "mapeamento participativo" "cartografia social"
	"modelling" "modeling" "modelagem"
Conservation and sustainable use	"protected area*" "área* protegida*" "unidade* de conserva*"
	"conservation planning" "planejamento para a conservação"
	"systematic conservation" "systematic planning" "systematic management" "manejo sistemático" "planejamento sistemático" "conservação sistemática"
	"sustainability" "sustentabilidade"
	sustainable-use "sustainable use" "uso* sustentável"

## Sheet: Research topics (D)
Supplementary Material D: Frequency of research topics
Categories	Topics	outside Brazil	inside Brazil	local case study		Categories	Topics	outside Brazil	inside Brazil	local case study		Topics	local case study	inside Brazil	outside Brazil
Mentioned	Spatial management	0.4324	0.875	1		Related to	Spatial management	0.3423	0.5	1		Focus on spatial management	1	0.5	0.3423
	Human territoriality	0.3063	0.5	1			Monitoring - assessment of an MPA	0.2703	0.5	1		Monitoring or assessment of and MPA	1	0.5	0.2703
	Governance	0.2342	0.4375	0			Zoning of MPA	0.2342	0.3125	1		Zoning of MPA	1	0.3125	0.2342
							Intro a new software	0.1712	0.1875	0		Introduction of new software	0	0.1875	0.1712
							Involves planning tool	0.027	0.1875	0		Use of planning tool	0	0.1875	0.027
							Development of models, framework or approach	0	0.1875	0		Development of model, framework or approach	0	0.1875	0
